# Supplementary material
Source: publisher figshare collection journal article supplement (https://acs.figshare.com/ndownloader/files/25440712)
Supplement: Supplementary file 1 [file 25440712]

## Supporting Information

### Selective Separation of Methylfuran and Dimethylfuran by Nonporous Adaptive Crystals of Pillararenes

Yitao Wu,<sup>a</sup> Jiong Zhou,<sup>a</sup> Errui Li,<sup>a</sup> Mengbin Wang,<sup>a</sup> Kecheng Jie,<sup>a</sup> Huangtianzhi Zhu\*,<sup>a</sup> and Feihe Huang\*,<sup>a,b</sup>

<sup>a</sup> *State Key Laboratory of Chemical Engineering, Center for Chemistry of High-Performance & Novel Materials, Department of Chemistry, Zhejiang University, Hangzhou, 310027, P. R. China*

*Fax and Tel: +86-571-8795-3189; Email address: htzzhu@zju.edu.cn fhuang@zju.edu.cn*

<sup>b</sup> *Green Catalysis Center and College of Chemistry, Zhengzhou University, Zhengzhou 450001, P. R. China*

#### Table of Content (48 pages)

|                                                              |     |
|--------------------------------------------------------------|-----|
| 1. <i>Materials</i>                                          | S2  |
| 2. <i>Methods</i>                                            | S2  |
| 3. <i>Crystallography Data</i>                               | S4  |
| 4. <i>Characterization of Activated Pillararene Crystals</i> | S8  |
| 5. <i>Vapor-Phase Adsorption Measurements</i>                | S14 |
| 6. <i>Recyclability Experiments</i>                          | S41 |
| 7. <i>Other Vapor-Phase Adsorption Cases</i>                 | S45 |
| 8. <i>References</i>                                         | S48 |

## 1. Materials

All the starting materials including 2-methylfuran (**MeF**), 2,5-dimethylfuran (**DMeF**) and 2-methyltetrahydrofuran (**MeTHF**) were purchased and used as received. Pillar[*n*]arenes (**EtP5**, **EtP6**, **BrP5**, **BrP6**) were synthesized as described previously.<sup>S1–S3</sup> Activated crystalline **EtP5**, **EtP6**, **BrP5** and **BrP6** were referred to as **EtP5 $\alpha$** , **EtP6 $\beta$** , **BrP5 $\alpha$**  and **BrP6 $\beta$**  respectively. **EtP5 $\alpha$** , **EtP6 $\beta$** , **BrP5 $\alpha$**  and **BrP6 $\beta$**  were prepared according to reported procedures.<sup>S4</sup> All the mixtures were v:v = 1:1, except specifically marked mixtures.

**Table S1.** Physical properties of **MeF** and **DMeF**.<sup>S5</sup>

| Substance   | Melting point (°C) | Boiling point (°C) | Saturated Vapor Pressure at 298 K (kPa) |
|-------------|--------------------|--------------------|-----------------------------------------|
| <b>MeF</b>  | −91.2              | 63.9               | 23.0                                    |
| <b>DMeF</b> | −62.8              | 96.0               | uncertain                               |

## 2. Methods

### 2.1. Powder X-Ray Diffraction

PXRD data were collected on a Rigaku Ultimate-IV X-Ray diffractometer operating at 40 kV/30 mA using the Cu K $\alpha$  line ( $\lambda$  = 1.5418 Å). Data were measured over the range 5–45° in 5°/min steps over 8 min.

### 2.2. Thermogravimetric Analysis

TGA analysis was carried out using a Q5000IR analyzer (TA Instruments) with an automated vertical overhead thermobalance. The samples were heated at 10 °C/min using N<sub>2</sub> as the protective gas.

### 2.3. Single Crystal Growth

Single crystals of guest-loaded **EtP5**, **EtP6**, **BrP5** or **BrP6** were grown by volatilization: 5.00 mg of dry **EtP5**, **EtP6**, **BrP5** or **BrP6** powder were put in a small vial where 1.00 mL of guest was added and the vial was heated until all the powder was dissolved. The light yellow crystals were got by volatilization for 2-15 days.

### 2.4. Single Crystal X-ray Diffraction

Single crystal X-ray diffraction data were collected on a Bruker D8 VENTURE CMOS X-ray diffractometer with graphite monochromatic Mo–K $\alpha$  radiation ( $\lambda$  = 0.71073 Å).

### 2.5. Solution <sup>1</sup>H NMR Spectroscopy

$^1\text{H}$  NMR spectra were recorded by using a Bruker Avance DMX 400 spectrometer and a Bruker Avance DMX 600 spectrometer.

## 2.6. Gas Chromatography

Gas chromatographic analysis: GC measurements were carried out using an Agilent 7890B instrument configured with an FID detector and a DB-624 column ( $30\text{ m} \times 0.53\text{ mm} \times 3.0\text{ }\mu\text{m}$ ). Samples were analyzed using headspace injections and were performed by incubating the sample at  $100\text{ }^\circ\text{C}$  for 10 min followed by sampling 1.00 mL of the headspace. The total volume of the container is 10 mL; the mass of the solid in the container is about 10 mg; the total volume of the headspace is 1mL. The following GC method was used: the oven was programmed from  $60\text{ }^\circ\text{C}$ , and ramped in  $5\text{ }^\circ\text{C min}^{-1}$  increments to  $200\text{ }^\circ\text{C}$  with 5 min hold; the total run time was 25 min; the injection temperature was  $250\text{ }^\circ\text{C}$ ; the detector temperature was  $280\text{ }^\circ\text{C}$  with nitrogen, air, and make-up flow-rates of 35, 350, and  $35\text{ mL min}^{-1}$ , respectively; helium (carrier gas) flow-rate was  $3.0\text{ mL min}^{-1}$ . The samples were injected in the split mode (30:1).

### 3. Crystallography Data

**Table S2.** Experimental single crystal X-ray data for **EtP5** structures.

|                                                                          | (MeF) <sub>2</sub> @EtP5                        | (DMeF) <sub>2</sub> @EtP5                       |
|--------------------------------------------------------------------------|-------------------------------------------------|-------------------------------------------------|
| Crystallization Solvent                                                  | 2-Methylfuran                                   | 2,5-Dimethylfuran                               |
| Collection Temperature                                                   | 170 K                                           | 170 K                                           |
| Formula                                                                  | C <sub>60</sub> H <sub>76</sub> O <sub>11</sub> | C <sub>67</sub> H <sub>86</sub> O <sub>12</sub> |
| <i>Mr</i>                                                                | 973.20                                          | 1083.35                                         |
| Crystal Size [mm]                                                        | 0.10 × 0.08 × 0.06                              | 0.18 × 0.16 × 0.15                              |
| Crystal System                                                           | triclinic                                       | monoclinic                                      |
| Space Group                                                              | P-1                                             | P2 <sub>1</sub> /n                              |
| <i>a</i> [Å]                                                             | 13.1670(3)                                      | 13.5823(3)                                      |
| <i>b</i> [Å]                                                             | 14.7060(4)                                      | 22.8453(6)                                      |
| <i>c</i> [Å]                                                             | 30.3360(7)                                      | 20.4508(5)                                      |
| <i>α</i> [°]                                                             | 87.8340(8)                                      | 90                                              |
| <i>β</i> [°]                                                             | 86.7890(8)                                      | 100.3730(10)                                    |
| <i>γ</i> [°]                                                             | 85.7650(9)                                      | 90                                              |
| <i>V</i> [Å <sup>3</sup> ]                                               | 5846.0(2)                                       | 6242.0(3)                                       |
| <i>Z</i>                                                                 | 4                                               | 4                                               |
| <i>D<sub>calcd</sub></i> [g cm <sup>-3</sup> ]                           | 1.106                                           | 1.153                                           |
| <i>μ</i> [mm <sup>-1</sup> ]                                             | 0.386                                           | 0.401                                           |
| <i>F</i> (000)                                                           | 2096                                            | 2336                                            |
| Radiation                                                                | GaK $\alpha$ ( $\lambda$ = 1.34139)             | GaK $\alpha$ ( $\lambda$ = 1.34139)             |
| 2 $\theta$ range [°]                                                     | 5.906–110.222                                   | 6.310–109.846                                   |
| Reflections collected                                                    | 21773                                           | 54766                                           |
| Independent reflections, <i>R<sub>int</sub></i>                          | 21773, 0.1414                                   | 11814, 0.0435                                   |
| Data /restraints /parameters                                             | 21773/333/1412                                  | 11814/0/726                                     |
| Final <i>R</i> <sub>1</sub> values ( <i>I</i> > 2 $\sigma$ ( <i>I</i> )) | 0.1337                                          | 0.0512                                          |
| Final <i>R</i> <sub>1</sub> values (all data)                            | 0.204                                           | 0.0608                                          |
| Final <i>wR</i> ( <i>F</i> <sub>2</sub> ) values (all data)              | 0.3712                                          | 0.1398                                          |
| Goodness-of-fit on <i>F</i> <sup>2</sup>                                 | 0.788                                           | 1.022                                           |
| Largest difference peak and hole [e.Å <sup>-3</sup> ]                    | 0.69/–0.36                                      | 0.79/–0.42                                      |
| CCDC                                                                     | 1975509                                         | 1975512                                         |

**Table S3.** Experimental single crystal X-ray data for **EtP6** structures.

|                                                                          | <b>(MeF)<sub>2</sub>@EtP6</b>                   | <b>DMeF@EtP6</b>                                 |
|--------------------------------------------------------------------------|-------------------------------------------------|--------------------------------------------------|
| Crystallization Solvent                                                  | 2-Methylfuran                                   | 2,5-Dimethylfuran                                |
| Collection Temperature                                                   | 170 K                                           | 170 K                                            |
| Formula                                                                  | C <sub>76</sub> H <sub>95</sub> O <sub>14</sub> | C <sub>78</sub> H <sub>100</sub> O <sub>14</sub> |
| <i>Mr</i>                                                                | 1232.51                                         | 1261.57                                          |
| Crystal Size [mm]                                                        | 0.15 × 0.08 × 0.06                              | 0.20 × 0.18 × 0.16                               |
| Crystal System                                                           | monoclinic                                      | triclinic                                        |
| Space Group                                                              | C2/c                                            | P-1                                              |
| <i>a</i> [Å]                                                             | 26.7857(15)                                     | 12.8203(3)                                       |
| <i>b</i> [Å]                                                             | 12.5558(7)                                      | 12.9026(3)                                       |
| <i>c</i> [Å]                                                             | 25.1482(14)                                     | 12.9306(3)                                       |
| $\alpha$ [°]                                                             | 90                                              | 61.2780(10)                                      |
| $\beta$ [°]                                                              | 118.9570(3)                                     | 73.3750(10)                                      |
| $\gamma$ [°]                                                             | 90                                              | 78.5590(10)                                      |
| <i>V</i> [Å <sup>3</sup> ]                                               | 7400.4(7)                                       | 1792.62(7)                                       |
| <i>Z</i>                                                                 | 4                                               | 1                                                |
| <i>D</i> <sub>calcd</sub> [g cm <sup>-3</sup> ]                          | 1.106                                           | 1.169                                            |
| $\mu$ [mm <sup>-1</sup> ]                                                | 0.387                                           | 0.406                                            |
| <i>F</i> (000)                                                           | 2652.0                                          | 680.0                                            |
| Radiation                                                                | GaK $\alpha$ ( $\lambda$ = 1.34139)             | GaK $\alpha$ ( $\lambda$ = 1.34139)              |
| 2 $\theta$ range [°]                                                     | 6.892–110.618                                   | 6.276–109.782                                    |
| Reflections collected                                                    | 35533                                           | 6612                                             |
| Independent reflections, <i>R</i> <sub>int</sub>                         | 6964, 0.0543                                    | 6612, 0.0709                                     |
| Data /restraints /parameters                                             | 6964/37/408                                     | 6612/0/424                                       |
| Final <i>R</i> <sub>1</sub> values ( <i>I</i> > 2 $\sigma$ ( <i>I</i> )) | 0.1408                                          | 0.0543                                           |
| Final <i>R</i> <sub>1</sub> values (all data)                            | 0.1509                                          | 0.0578                                           |
| Final <i>wR</i> ( <i>F</i> <sub>2</sub> ) values (all data)              | 0.3525                                          | 0.1518                                           |
| Goodness-of-fit on <i>F</i> <sup>2</sup>                                 | 0.922                                           | 1.037                                            |
| Largest difference peak and hole [e.Å <sup>-3</sup> ]                    | 0.90/–0.43                                      | 0.31/–0.33                                       |
| CCDC                                                                     | 1975510                                         | 1975511                                          |

**Table S4.** Experimental single crystal X-ray data for **BrP5** structures.

|                                                                          | (MeF) <sub>2</sub> @BrP5                                         | (DMeF) <sub>2</sub> @BrP5                                        |
|--------------------------------------------------------------------------|------------------------------------------------------------------|------------------------------------------------------------------|
| Crystallization Solvent                                                  | 2-Methylfuran                                                    | 2,5-Dimethylfuran                                                |
| Collection Temperature                                                   | 170 K                                                            | 293(2) K                                                         |
| Formula                                                                  | C <sub>60</sub> H <sub>66</sub> Br <sub>10</sub> O <sub>11</sub> | C <sub>67</sub> H <sub>76</sub> Br <sub>10</sub> O <sub>12</sub> |
| <i>Mr</i>                                                                | 1762.22                                                          | 1872.37                                                          |
| Crystal Size [mm]                                                        | 0.08 × 0.06 × 0.06                                               | 0.15 × 0.08 × 0.06                                               |
| Crystal System                                                           | orthorhombic                                                     | monoclinic                                                       |
| Space Group                                                              | Pbcn                                                             | C2/c                                                             |
| <i>a</i> [Å]                                                             | 24.4691(9)                                                       | 28.6532(17)                                                      |
| <i>b</i> [Å]                                                             | 20.7774(8)                                                       | 12.3731(8)                                                       |
| <i>c</i> [Å]                                                             | 12.8545(5)                                                       | 44.2420(3)                                                       |
| $\alpha$ [°]                                                             | 90                                                               | 90                                                               |
| $\beta$ [°]                                                              | 90                                                               | 108.8360(2)                                                      |
| $\gamma$ [°]                                                             | 90                                                               | 90                                                               |
| <i>V</i> [Å <sup>3</sup> ]                                               | 6535.3(4)                                                        | 14845.0(17)                                                      |
| <i>Z</i>                                                                 | 4                                                                | 8                                                                |
| <i>D</i> <sub>calcd</sub> [g cm <sup>-3</sup> ]                          | 1.791                                                            | 1.676                                                            |
| $\mu$ [mm <sup>-1</sup> ]                                                | 5.539                                                            | 6.883                                                            |
| <i>F</i> (000)                                                           | 3456.0                                                           | 7392.0                                                           |
| Radiation                                                                | GaK $\alpha$ ( $\lambda$ = 1.34139)                              | GaK $\alpha$ ( $\lambda$ = 1.34139)                              |
| 2 $\theta$ range [°]                                                     | 6.286–110.114                                                    | 7.854–139.04                                                     |
| Reflections collected                                                    | 62688                                                            | 39826                                                            |
| Independent reflections, <i>R</i> <sub>int</sub>                         | 6244, 0.1197                                                     | 13447, 0.0616                                                    |
| Data /restraints /parameters                                             | 6244/57/394                                                      | 13447/207/806                                                    |
| Final <i>R</i> <sub>1</sub> values ( <i>I</i> > 2 $\sigma$ ( <i>I</i> )) | 0.0982                                                           | 0.1619                                                           |
| Final <i>R</i> <sub>1</sub> values (all data)                            | 0.1304                                                           | 0.2183                                                           |
| Final <i>wR</i> ( <i>F</i> <sub>2</sub> ) values (all data)              | 0.3197                                                           | 0.4225                                                           |
| Goodness-of-fit on <i>F</i> <sup>2</sup>                                 | 1.173                                                            | 1.563                                                            |
| Largest difference peak and hole [e.Å <sup>-3</sup> ]                    | 2.33/–1.76                                                       | 2.26/–2.08                                                       |
| CCDC                                                                     | 1975513                                                          | 1975514                                                          |

**Table S5.** Experimental single crystal X-ray data for **BrP6** structures.

|                                                                          | <b>(MeF)<sub>2</sub>@BrP6</b>                                    | <b>DMeF@BrP6</b>                                                 |
|--------------------------------------------------------------------------|------------------------------------------------------------------|------------------------------------------------------------------|
| Crystallization Solvent                                                  | 2-Methylfuran                                                    | 2,5-Dimethylfuran                                                |
| Collection Temperature                                                   | 170 K                                                            | 170 K                                                            |
| Formula                                                                  | C <sub>71</sub> H <sub>78</sub> Br <sub>12</sub> O <sub>13</sub> | C <sub>78</sub> H <sub>88</sub> Br <sub>12</sub> O <sub>14</sub> |
| <i>Mr</i>                                                                | 2098.25                                                          | 2208.40                                                          |
| Crystal Size [mm]                                                        | 0.18 × 0.16 × 0.15                                               | 0.06 × 0.06 × 0.05                                               |
| Crystal System                                                           | triclinic                                                        | orthorhombic                                                     |
| Space Group                                                              | P-1                                                              | Pbcn                                                             |
| <i>a</i> [Å]                                                             | 14.1746(4)                                                       | 13.8496(2)                                                       |
| <i>b</i> [Å]                                                             | 16.4665(6)                                                       | 23.9980(3)                                                       |
| <i>c</i> [Å]                                                             | 19.6666(6)                                                       | 25.2072(3)                                                       |
| $\alpha$ [°]                                                             | 79.1720(2)                                                       | 90                                                               |
| $\beta$ [°]                                                              | 77.5990(2)                                                       | 90                                                               |
| $\gamma$ [°]                                                             | 72.4790(2)                                                       | 90                                                               |
| <i>V</i> [Å <sup>3</sup> ]                                               | 4237.6(2)                                                        | 8377.93(19)                                                      |
| <i>Z</i>                                                                 | 2                                                                | 4                                                                |
| <i>D</i> <sub>calcd</sub> [g cm <sup>-3</sup> ]                          | 1.644                                                            | 1.751                                                            |
| $\mu$ [mm <sup>-1</sup> ]                                                | 4.954                                                            | 5.041                                                            |
| <i>F</i> (000)                                                           | 2056.0                                                           | 4352.0                                                           |
| Radiation                                                                | GaK $\alpha$ ( $\lambda$ = 1.34139)                              | GaK $\alpha$ ( $\lambda$ = 1.34139)                              |
| 2 $\theta$ range [°]                                                     | 5.952–109.948                                                    | 6.410–109.860                                                    |
| Reflections collected                                                    | 44643                                                            | 88933                                                            |
| Independent reflections, <i>R</i> <sub>int</sub>                         | 16022, 0.0540                                                    | 7963, 0.0420                                                     |
| Data /restraints /parameters                                             | 16022/149/957                                                    | 7963/0/481                                                       |
| Final <i>R</i> <sub>1</sub> values ( <i>I</i> > 2 $\sigma$ ( <i>I</i> )) | 0.1095                                                           | 0.0391                                                           |
| Final <i>R</i> <sub>1</sub> values (all data)                            | 0.1333                                                           | 0.0421                                                           |
| Final <i>wR</i> ( <i>F</i> <sub>2</sub> ) values (all data)              | 0.2756                                                           | 0.1041                                                           |
| Goodness-of-fit on <i>F</i> <sup>2</sup>                                 | 0.925                                                            | 1.037                                                            |
| Largest difference peak and hole [e.Å <sup>-3</sup> ]                    | 2.67/–2.29                                                       | 1.62/–1.21                                                       |
| CCDC                                                                     | 1975516                                                          | 1975515                                                          |

#### 4. Characterization of Activated Pillararene Crystals

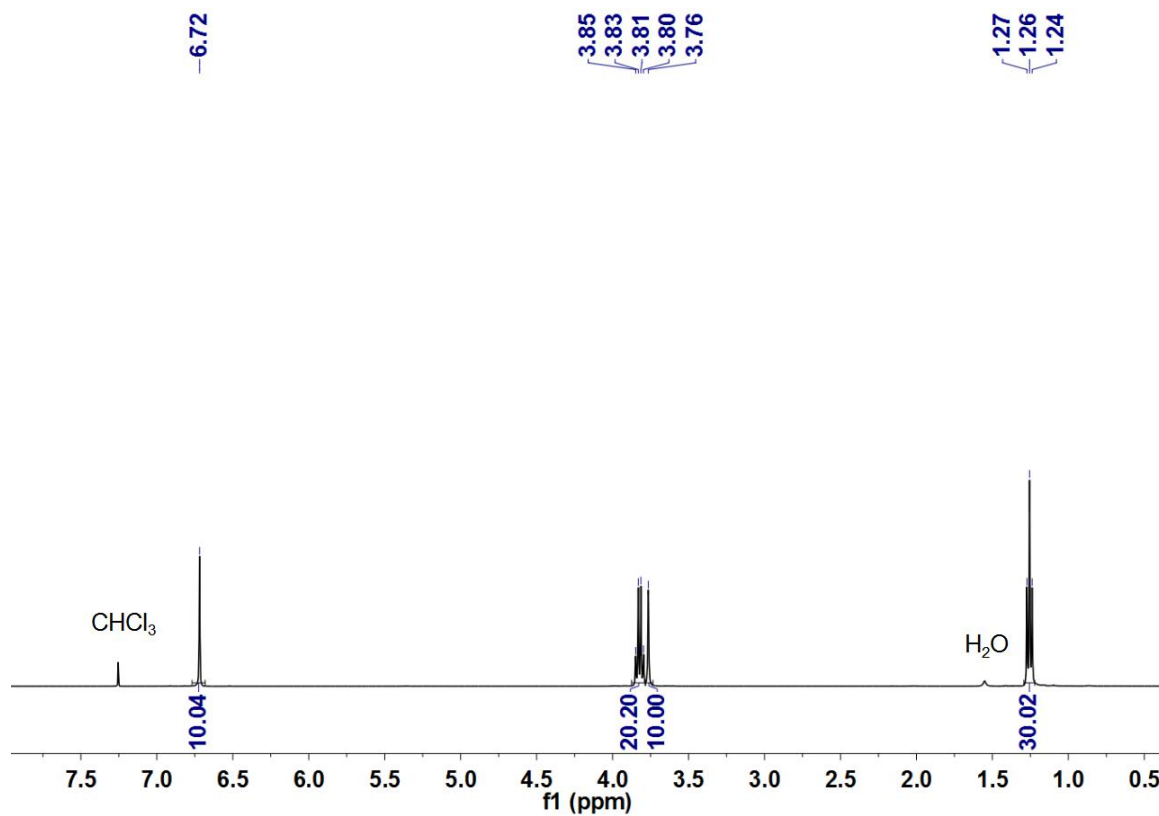

**Figure S1.** <sup>1</sup>H NMR spectrum (600 MHz, chloroform-*d*, 298 K) of EtP5 $\alpha$

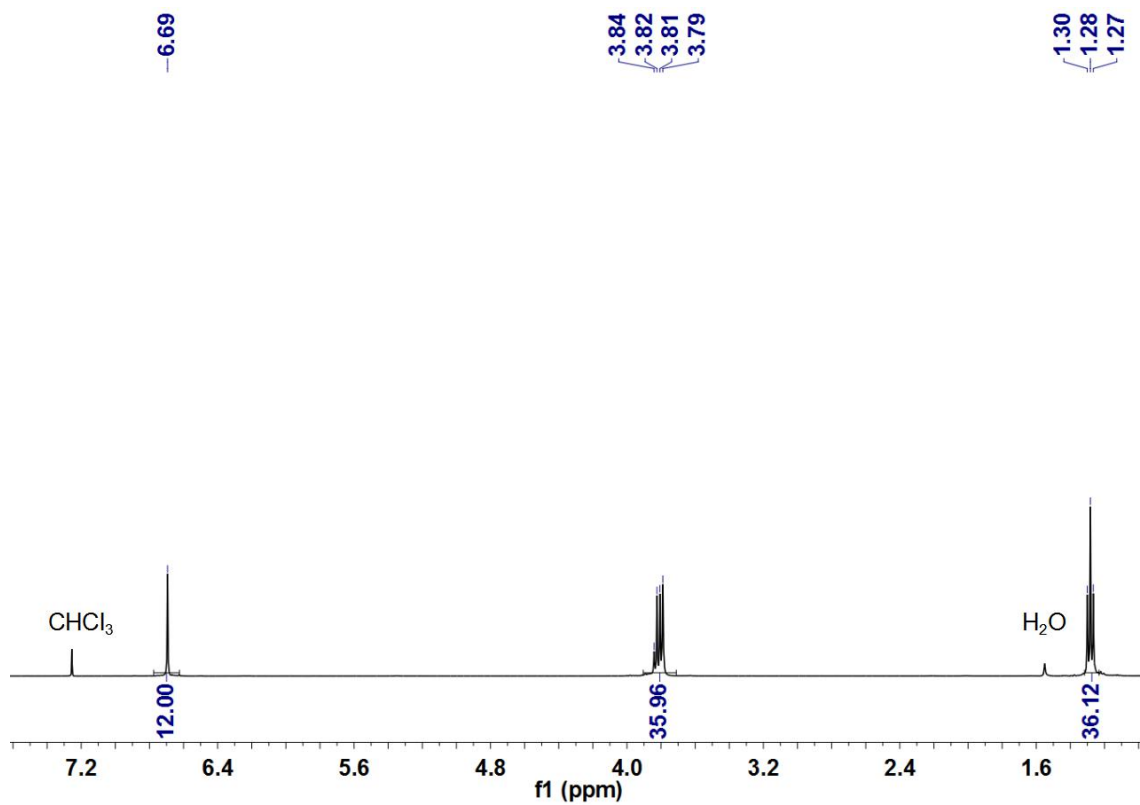

**Figure S2.** <sup>1</sup>H NMR spectrum (600 MHz, chloroform-*d*, 298 K) of EtP6 $\beta$



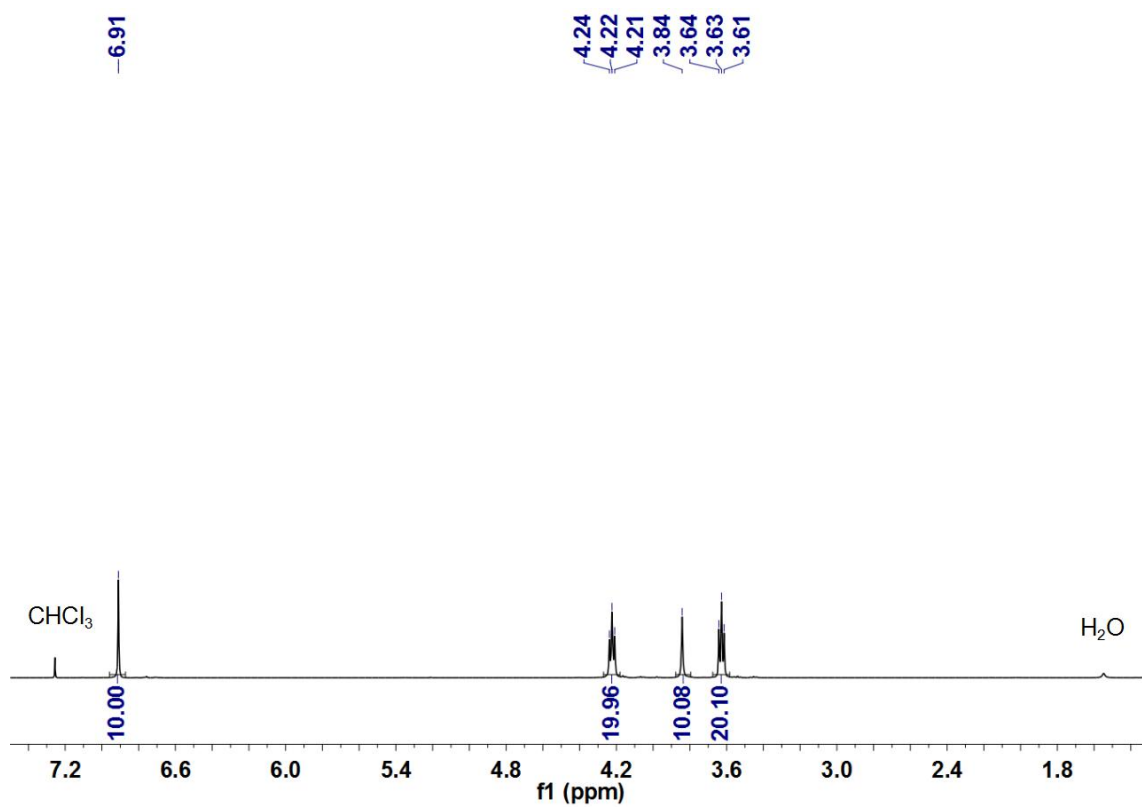

**Figure S3.** <sup>1</sup>H NMR spectrum (600 MHz, chloroform-*d*, 298 K) of **BrP5 $\alpha$**

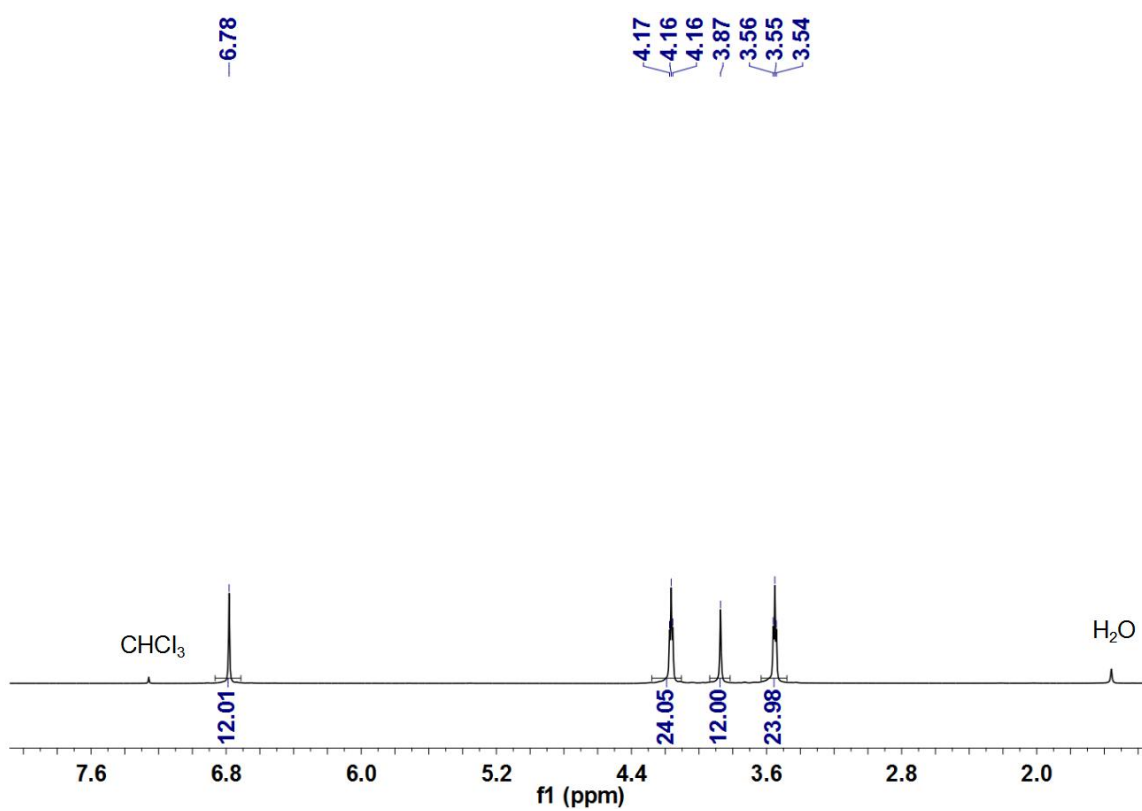

**Figure S4.** <sup>1</sup>H NMR spectrum (600 MHz, chloroform-*d*, 298 K) of **BrP6 $\beta$**

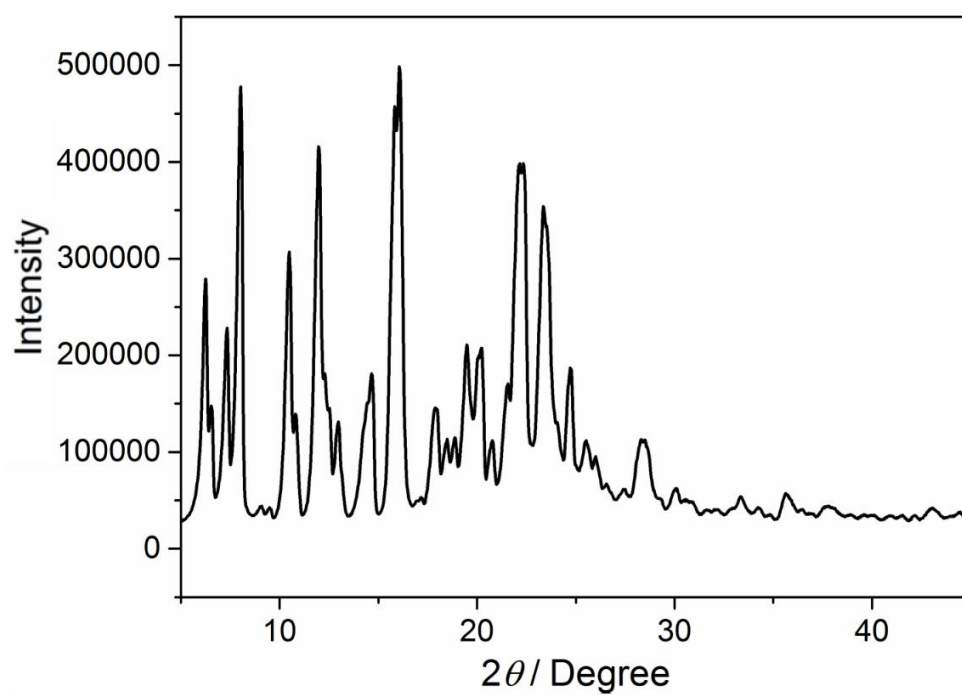

**Figure S5.** Powder X-ray diffraction pattern of EtP5 $\alpha$

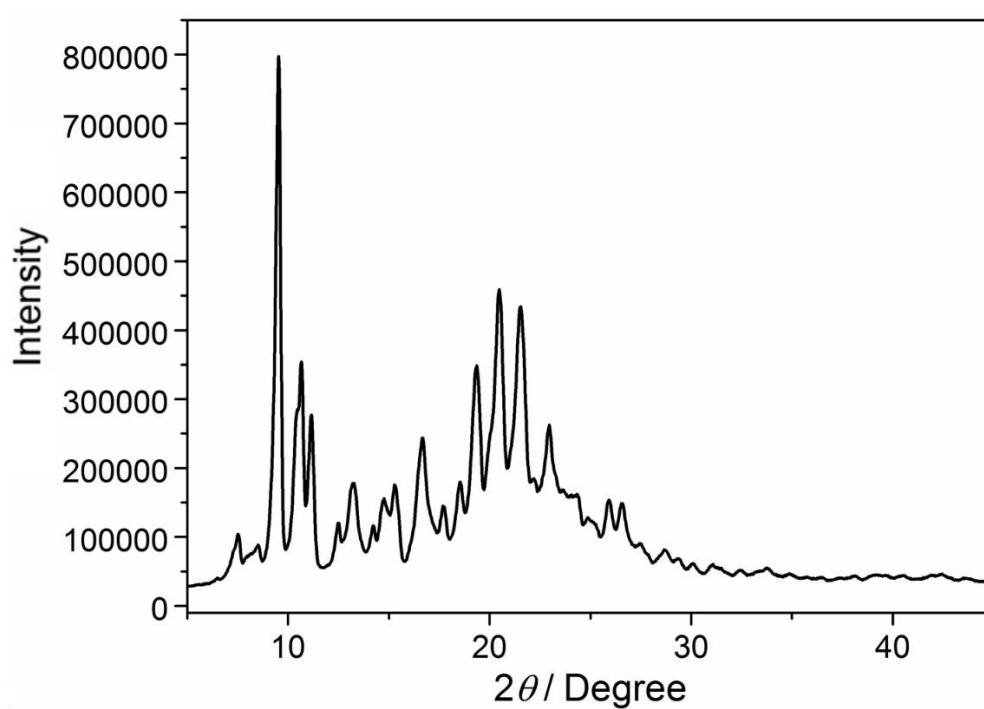

**Figure S6.** Powder X-ray diffraction pattern of EtP6 $\beta$

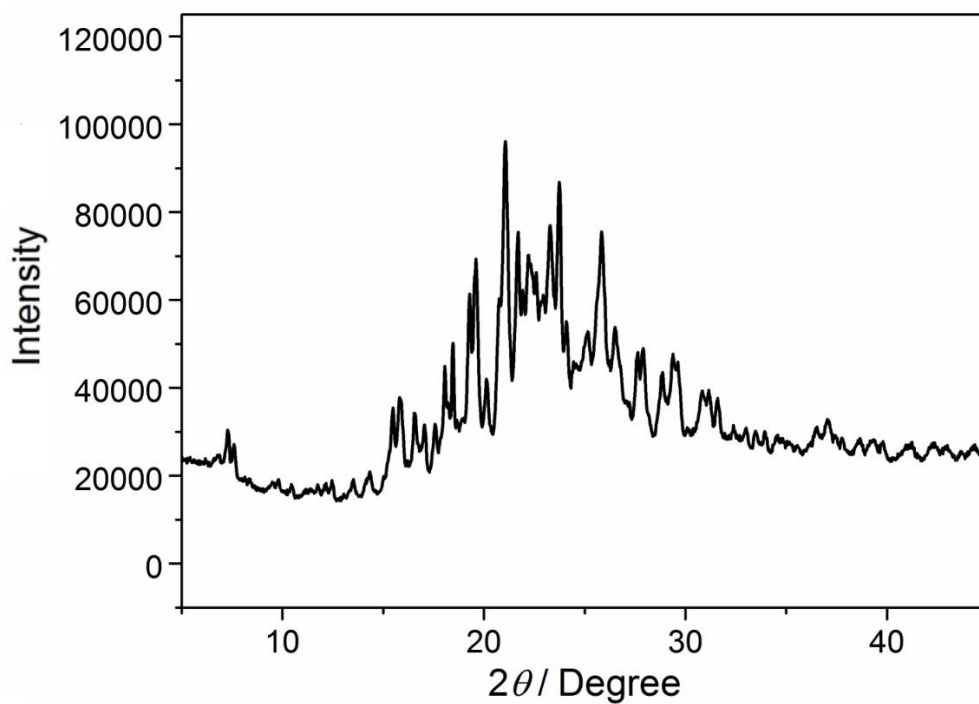

**Figure S7.** Powder X-ray diffraction pattern of **BrP5 $\alpha$**

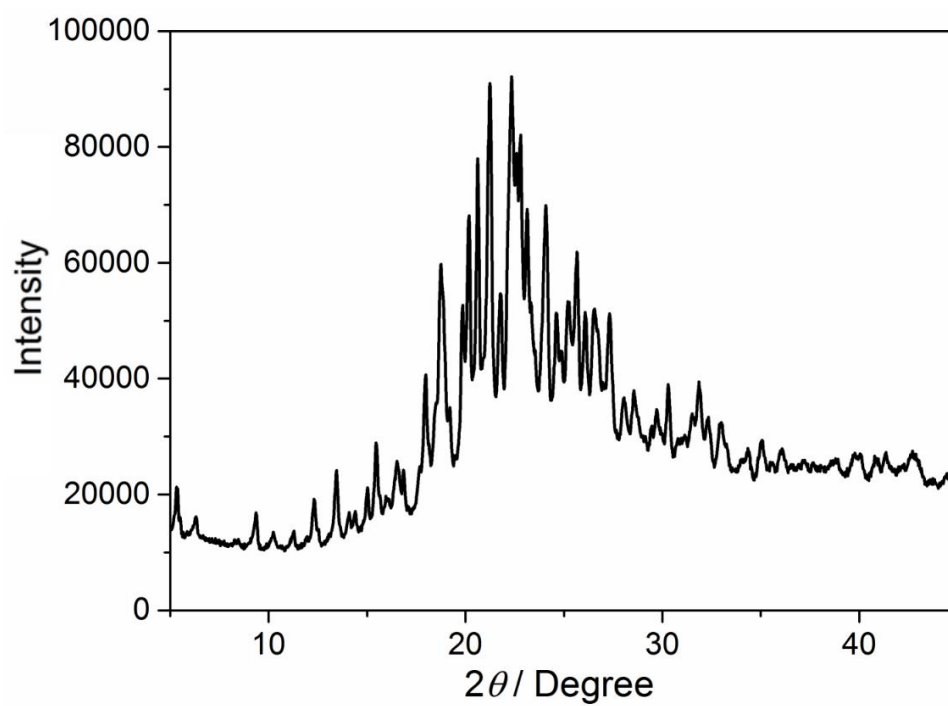

**Figure S8.** Powder X-ray diffraction pattern of **BrP6 $\beta$**

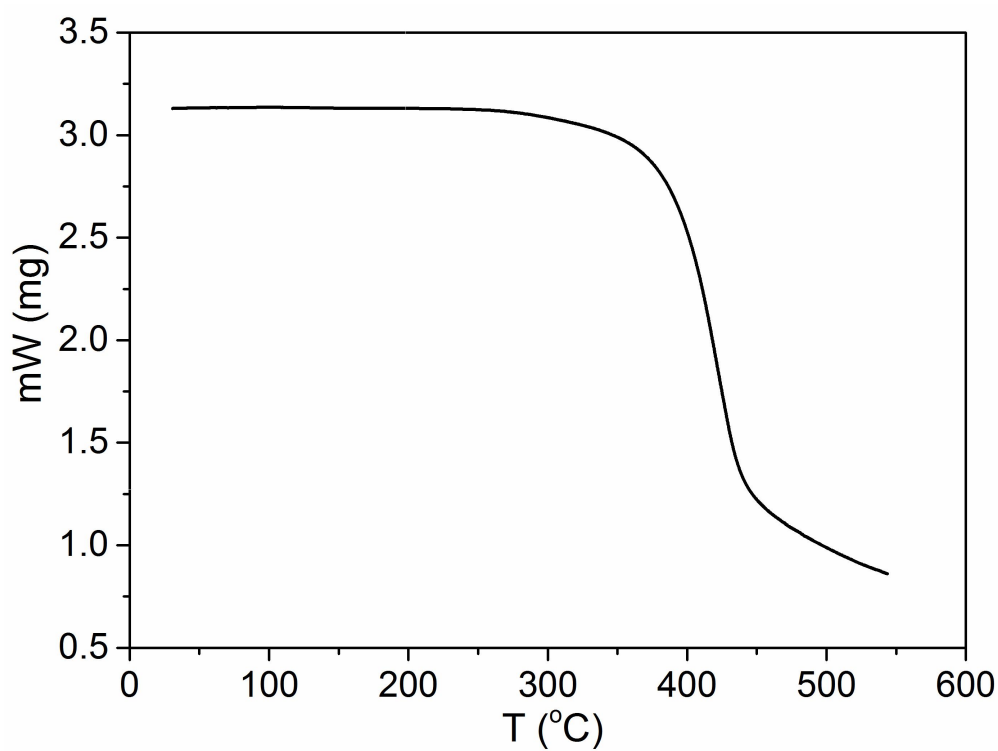

**Figure S9.** Thermogravimetric analysis of desolvated **EtP5 $\alpha$**

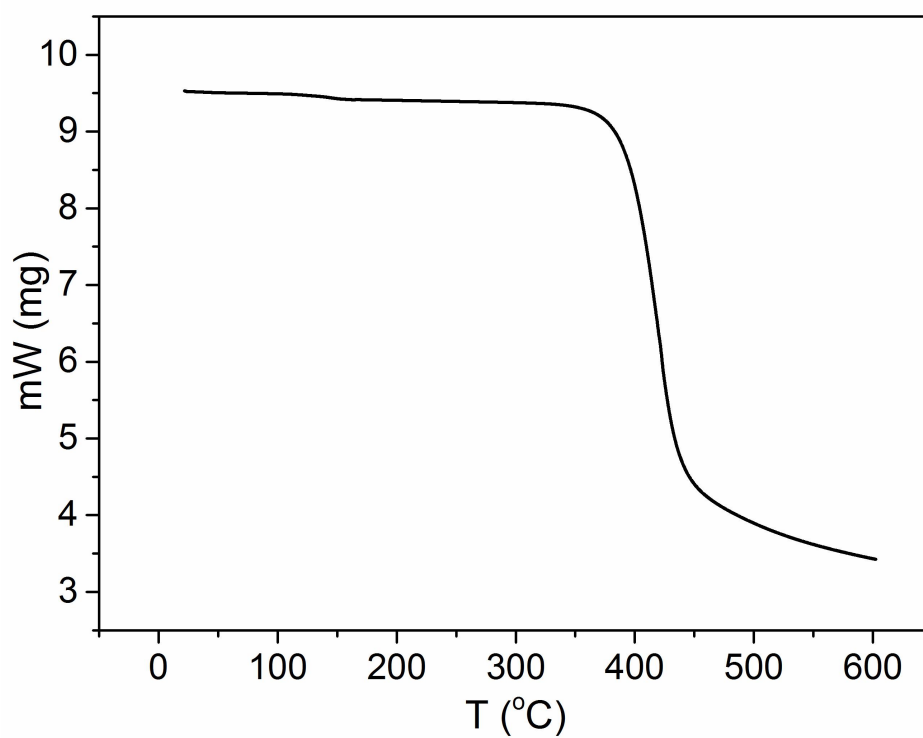

**Figure S10.** Thermogravimetric analysis of desolvated **EtP6 $\beta$**

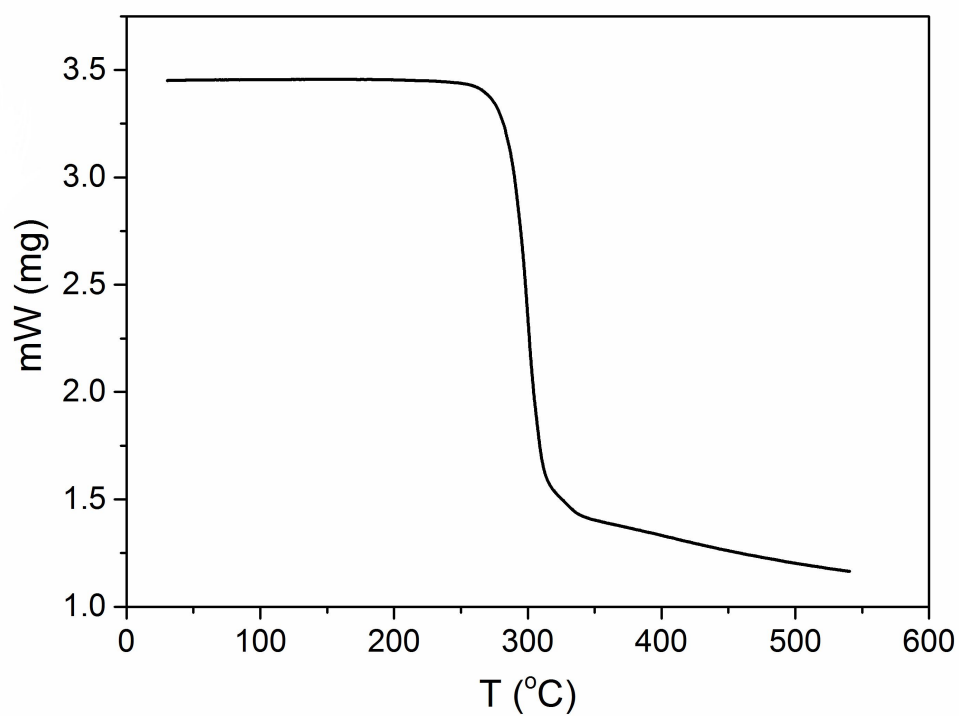

**Figure S11.** Thermogravimetric analysis of desolvated **BrP5 $\alpha$**

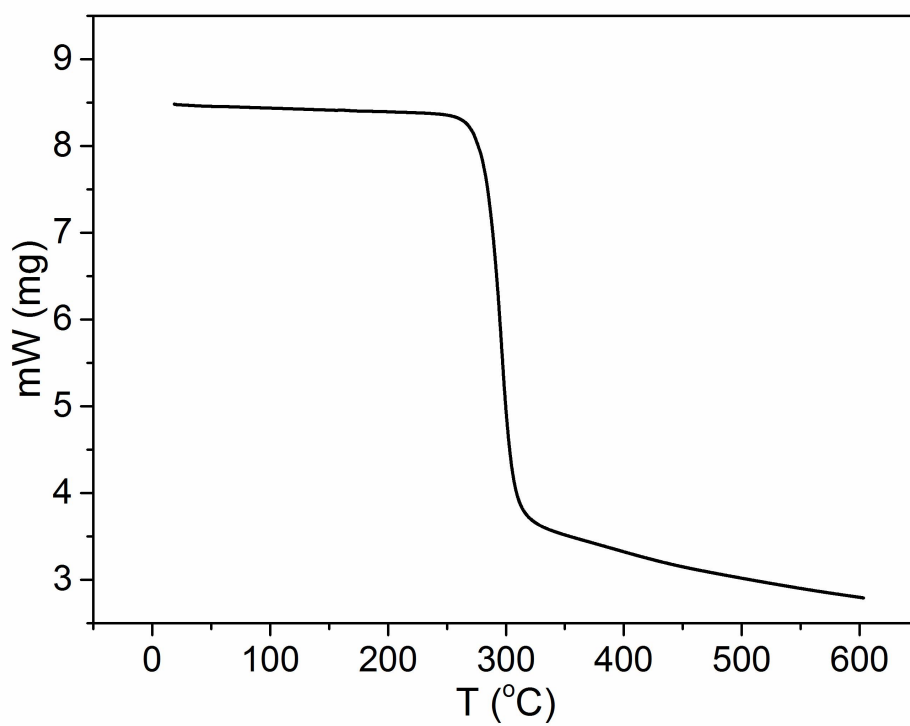

**Figure S12.** Thermogravimetric analysis of desolvated **BrP6 $\beta$**

## 5. Vapor-Phase Adsorption Measurements

### 5.1. Single-Component **MeF** and **DMeF** Adsorption Experiments

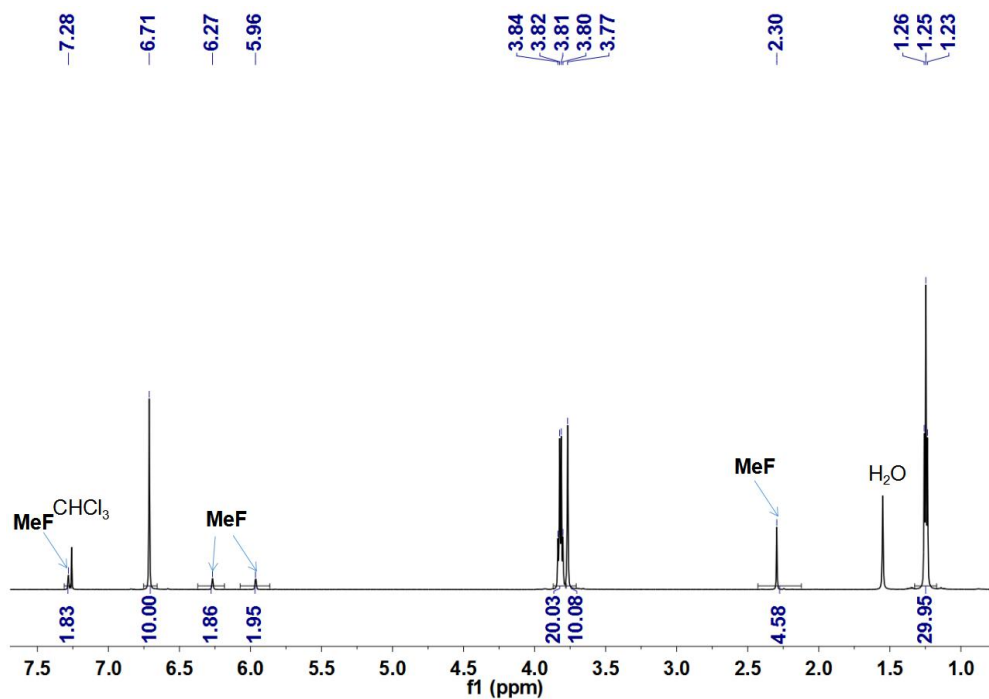

**Figure S13.**  $^1\text{H}$  NMR spectrum (600 MHz, chloroform-*d*, 298 K) of **EtP5a** after adsorption of **MeF** vapor.

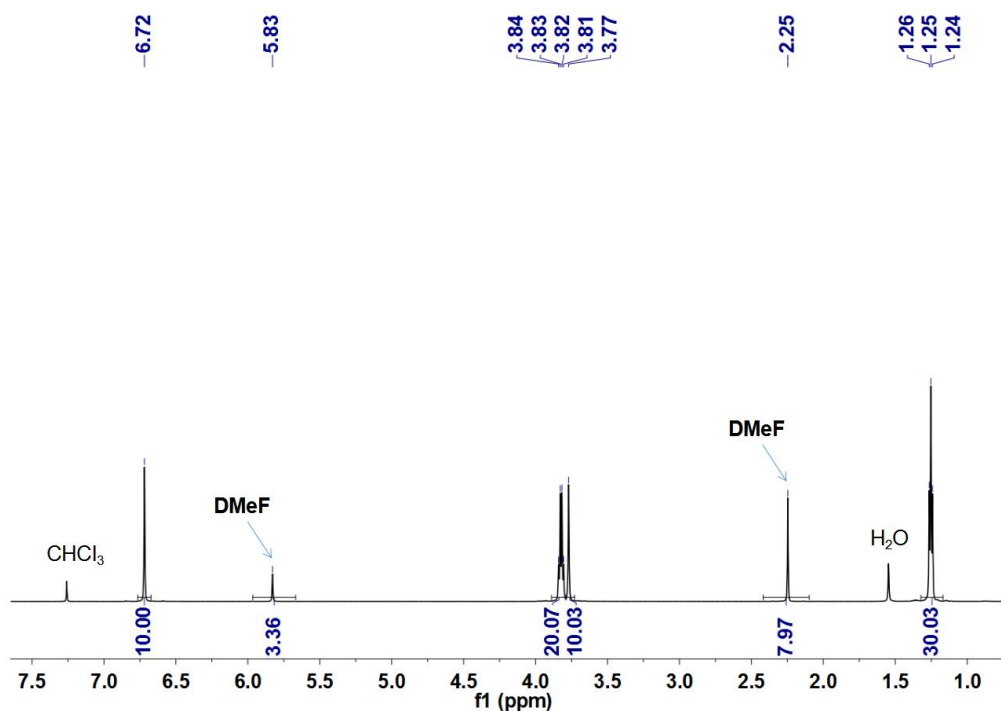

**Figure S14.**  $^1\text{H}$  NMR spectrum (600 MHz, chloroform-*d*, 298 K) of **EtP5a** after adsorption of **DMeF** vapor.

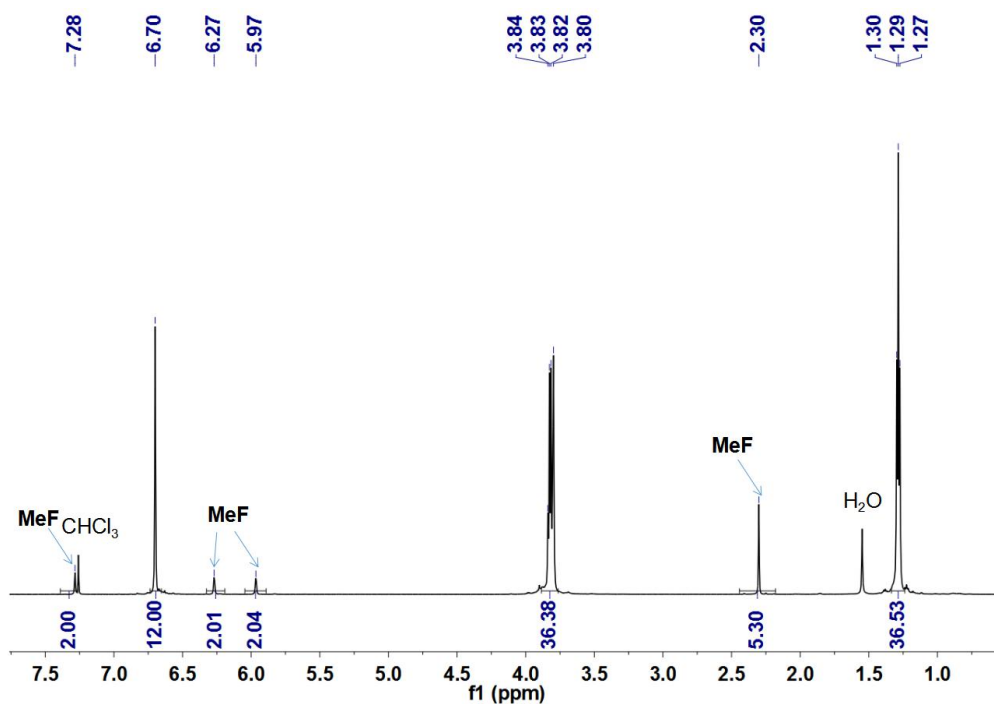

**Figure S15.** <sup>1</sup>H NMR spectrum (600 MHz, chloroform-*d*, 298 K) of EtP6β after adsorption of MeF vapor.

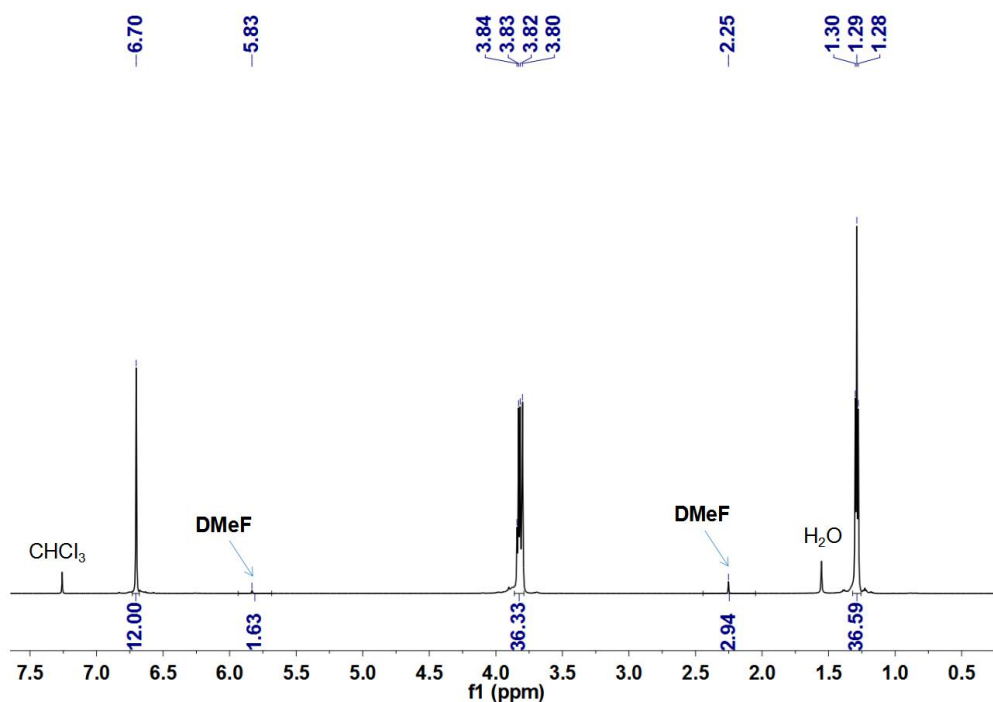

**Figure S16.** <sup>1</sup>H NMR spectrum (600 MHz, chloroform-*d*, 298 K) of EtP6β after adsorption of DMeF vapor.

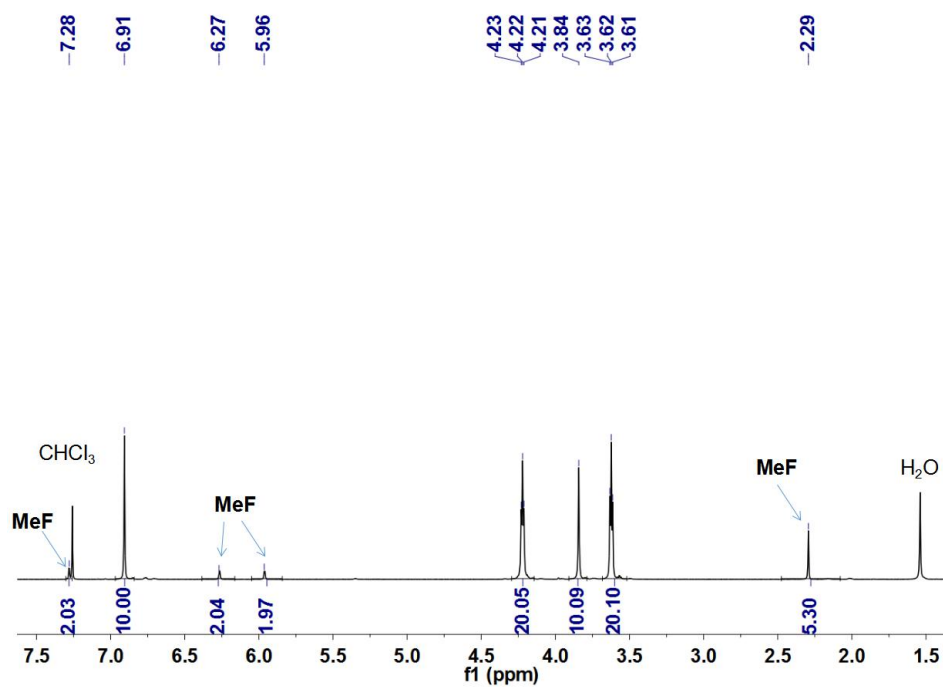

**Figure S17.** <sup>1</sup>H NMR spectrum (600 MHz, chloroform-*d*, 298 K) of **BrP5α** after adsorption of **MeF** vapor.

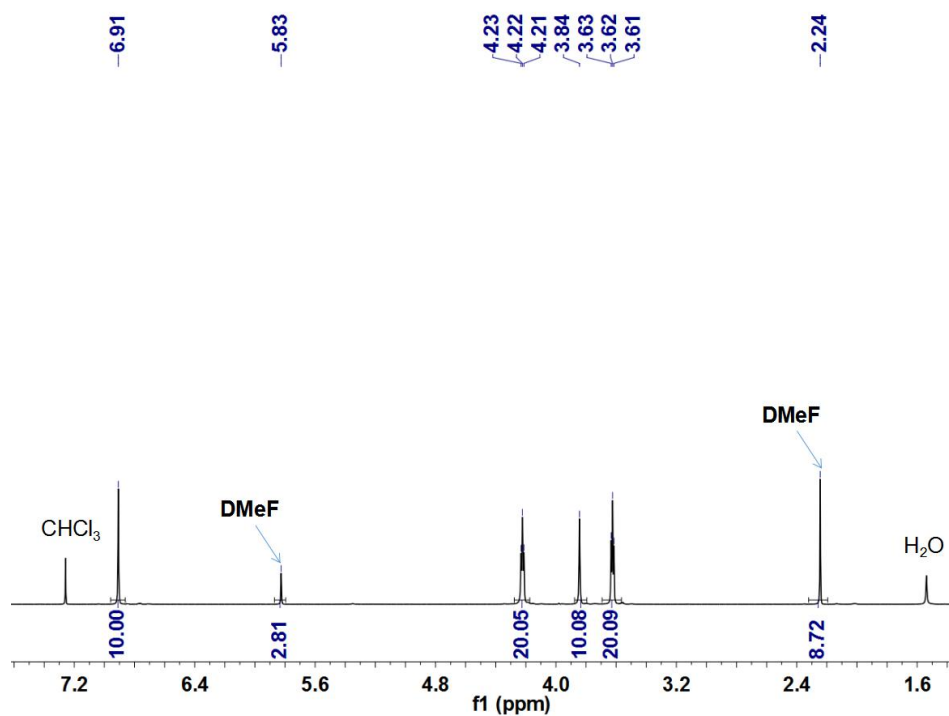

**Figure S18.** <sup>1</sup>H NMR spectrum (600 MHz, chloroform-*d*, 298 K) of **BrP5α** after adsorption of **DMeF** vapor.



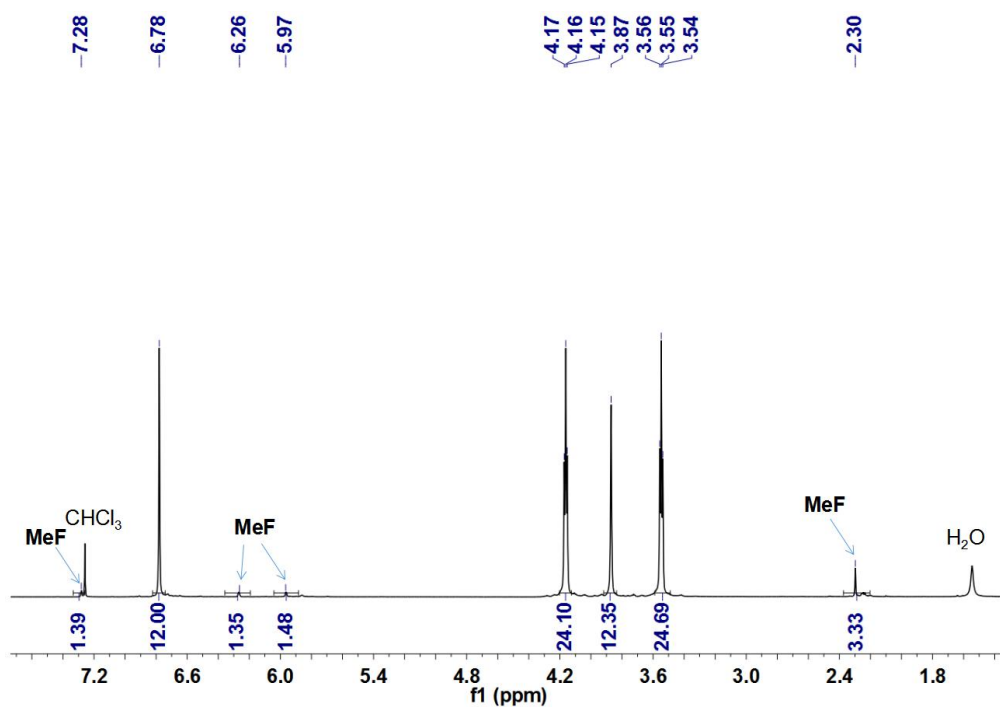

**Figure S19.** <sup>1</sup>H NMR spectrum (600 MHz, chloroform-*d*, 298 K) of **BrP6β** after adsorption of **MeF** vapor.

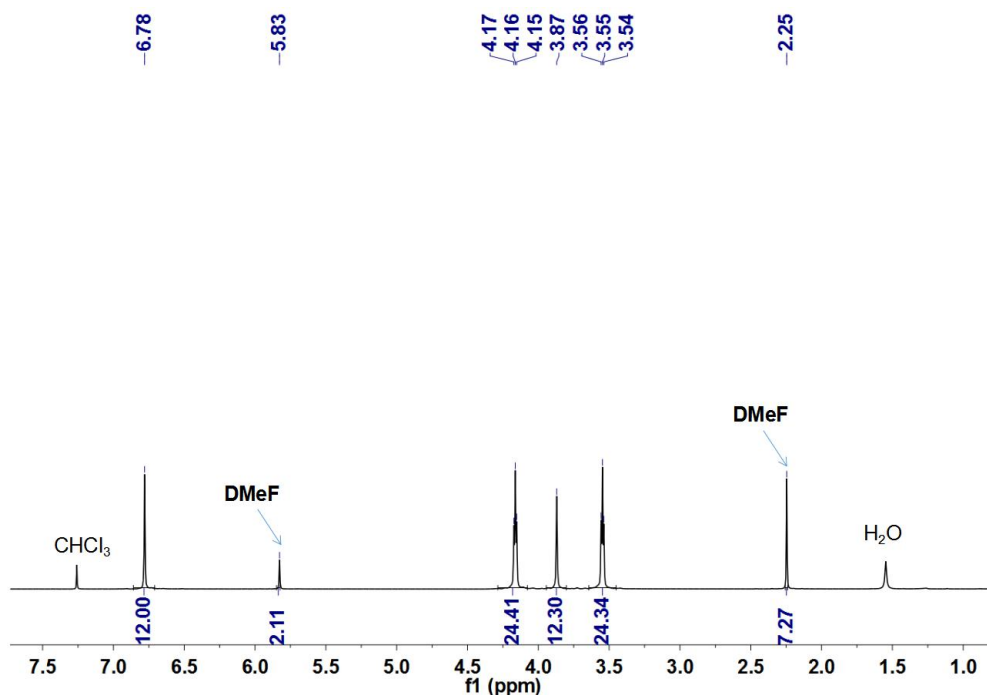

**Figure S20.** <sup>1</sup>H NMR spectrum (600 MHz, chloroform-*d*, 298 K) of **BrP6β** after adsorption of **DMeF** vapor.

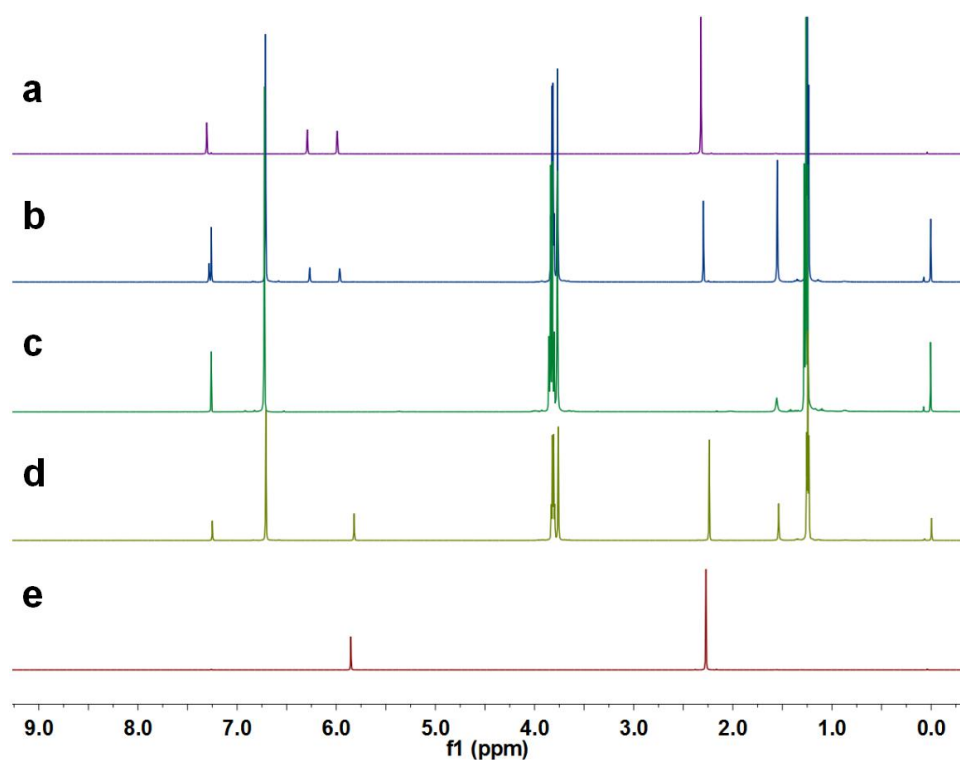

**Figure S21.**  $^1\text{H}$  NMR spectra (400 MHz,  $\text{CDCl}_3$ , 298 K): (a) **MeF**; (b) **MeF** after mixing with **EtP5**; (c) **EtP5**; (d) **DMeF** after mixing with **EtP5**; (e) **DMeF**.

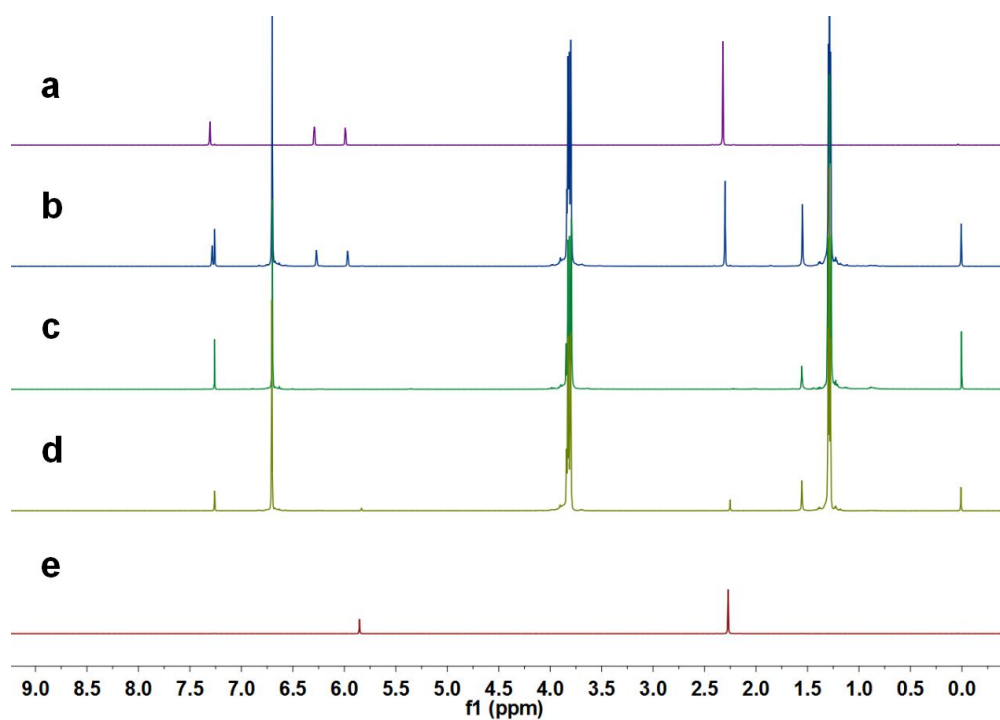

**Figure S22.**  $^1\text{H}$  NMR spectra (400 MHz,  $\text{CDCl}_3$ , 298 K): (a) **MeF**; (b) **MeF** after mixing with **EtP6**; (c) **EtP6**; (d) **DMeF** after mixing with **EtP6**; (e) **DMeF**.

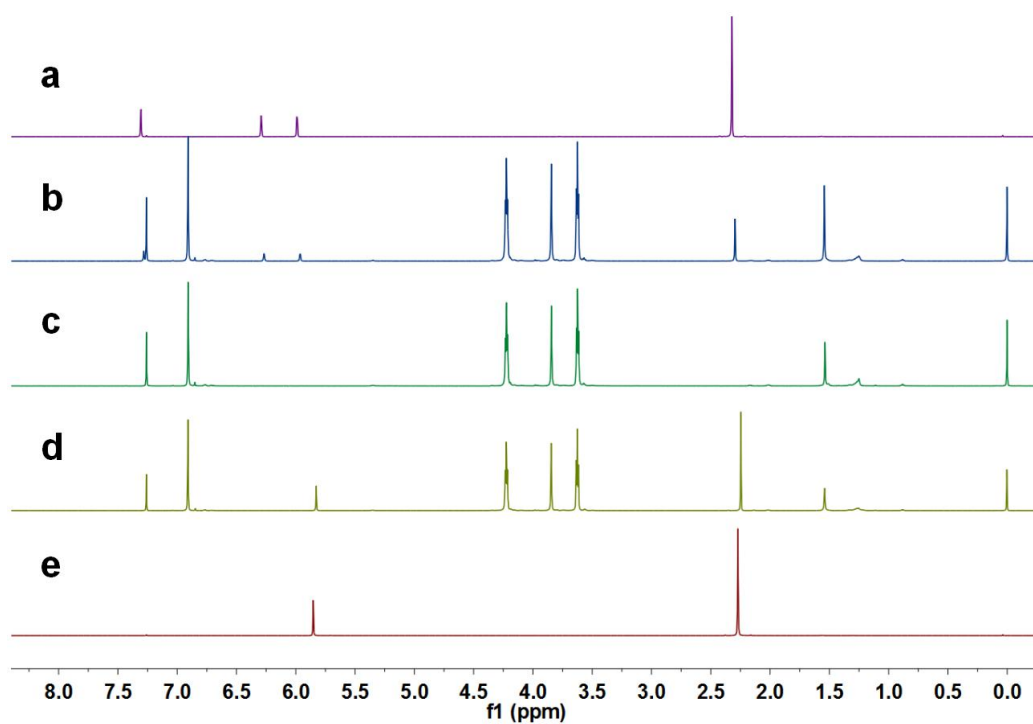

**Figure S23.**  $^1\text{H}$  NMR spectra (400 MHz,  $\text{CDCl}_3$ , 298 K): (a) **MeF**; (b) **MeF** after mixing with **BrP5**; (c) **BrP5**; (d) **DMeF** after mixing with **BrP5**; (e) **DMeF**.

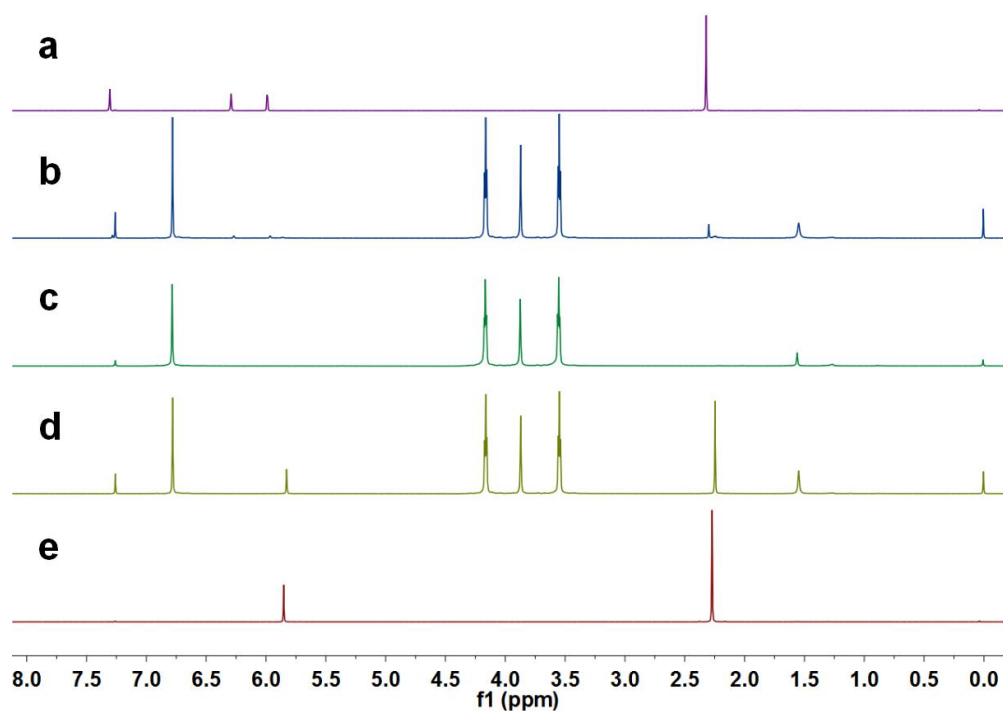

**Figure S24.**  $^1\text{H}$  NMR spectra (400 MHz,  $\text{CDCl}_3$ , 298 K): (a) **MeF**; (b) **MeF** after mixing with **BrP6**; (c) **BrP6**; (d) **DMeF** after mixing with **BrP6**; (e) **DMeF**.

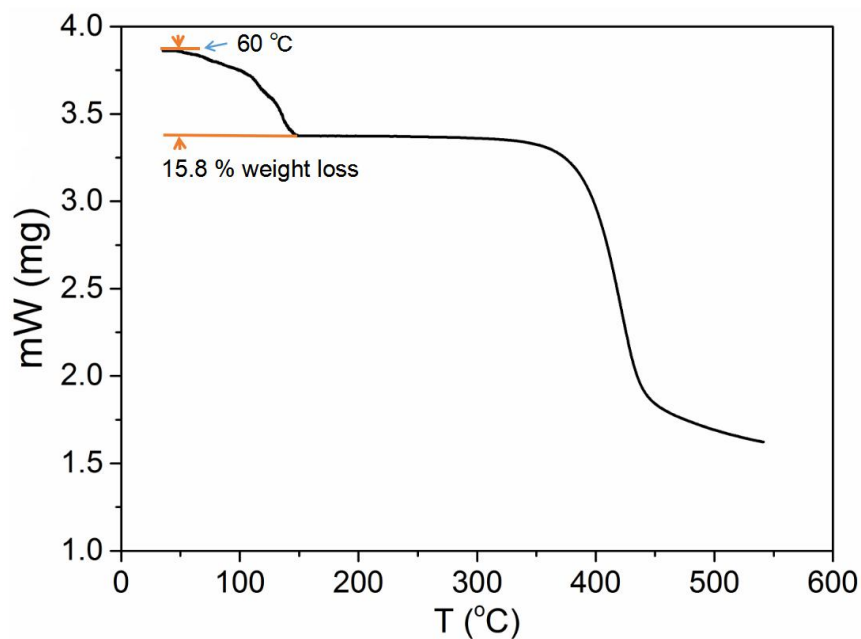

**Figure S25.** Thermogravimetric analysis of desolvated **EtP5 $\alpha$**  after sorption of **MeF** vapor. The weight loss below 150 °C can be calculated as two **MeF** molecules per **EtP5** molecule.

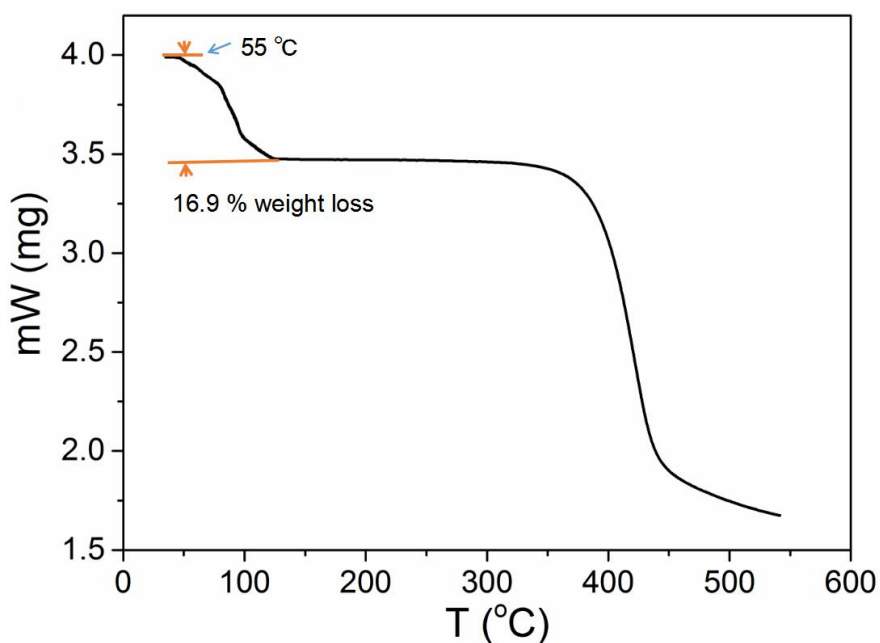

**Figure S26.** Thermogravimetric analysis of desolvated **EtP5 $\alpha$**  after sorption of **DMeF** vapor. The weight loss below 150 °C can be calculated as two **DMeF** molecules per **EtP5** molecule.

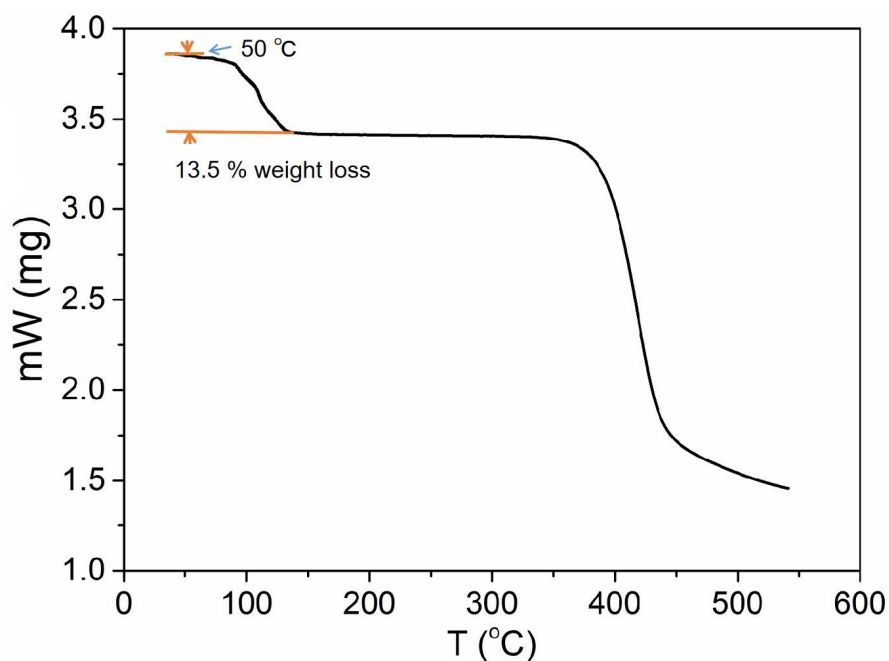

**Figure S27.** Thermogravimetric analysis of desolvated **EtP6 $\beta$**  after sorption of **MeF** vapor. The weight loss below 150 °C can be calculated as two **MeF** molecules per **EtP6** molecule.

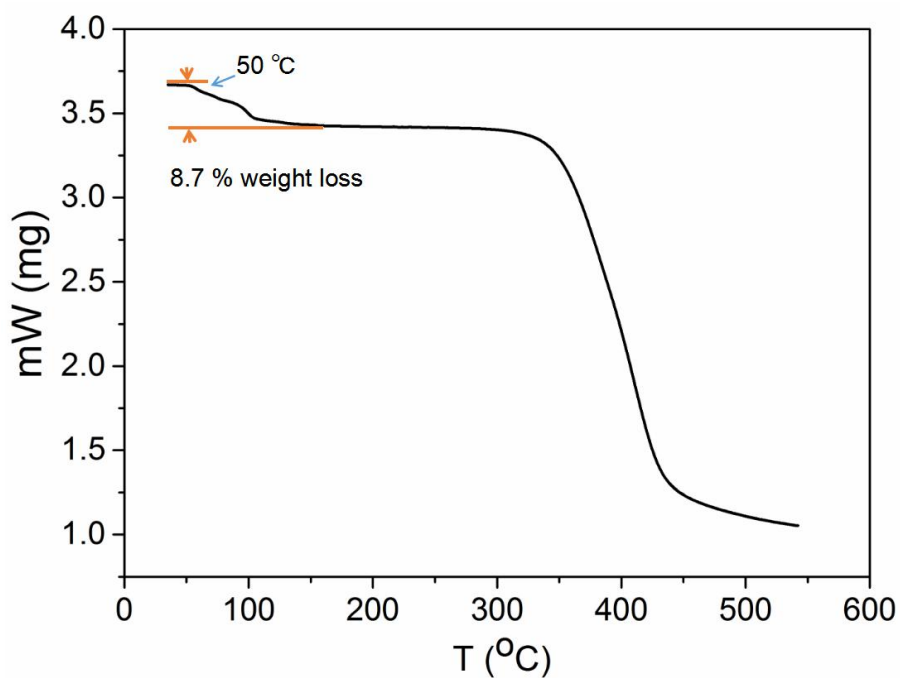

**Figure S28.** Thermogravimetric analysis of desolvated **EtP6 $\beta$**  after sorption of **DMeF** vapor. The weight loss below 150 °C can be calculated as one **DMeF** molecule per **EtP6** molecule.

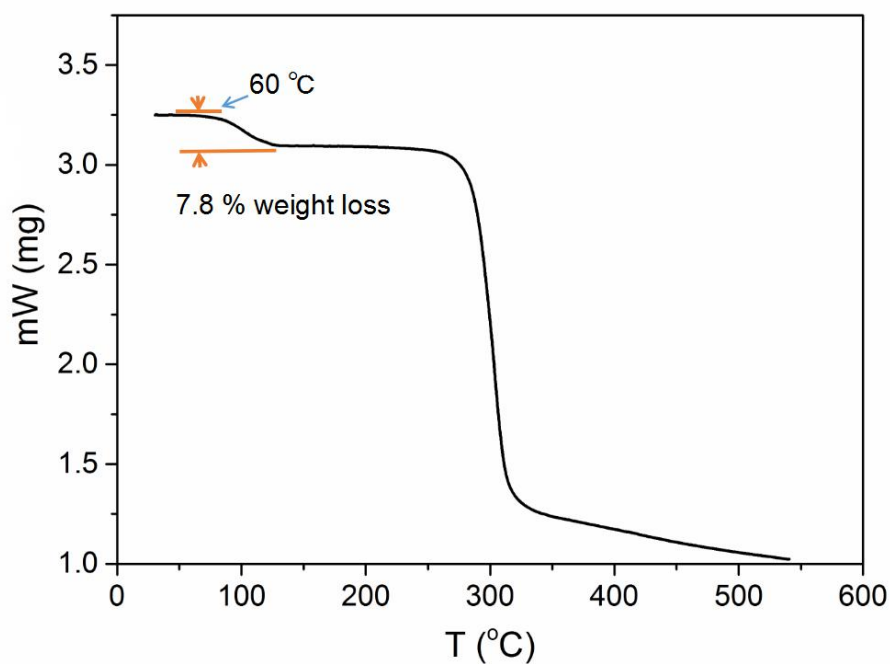

**Figure S29.** Thermogravimetric analysis of desolvated **BrP5 $\alpha$**  after sorption of **MeF** vapor. The weight loss below 150 °C can be calculated as two **MeF** molecules per **BrP5** molecule.

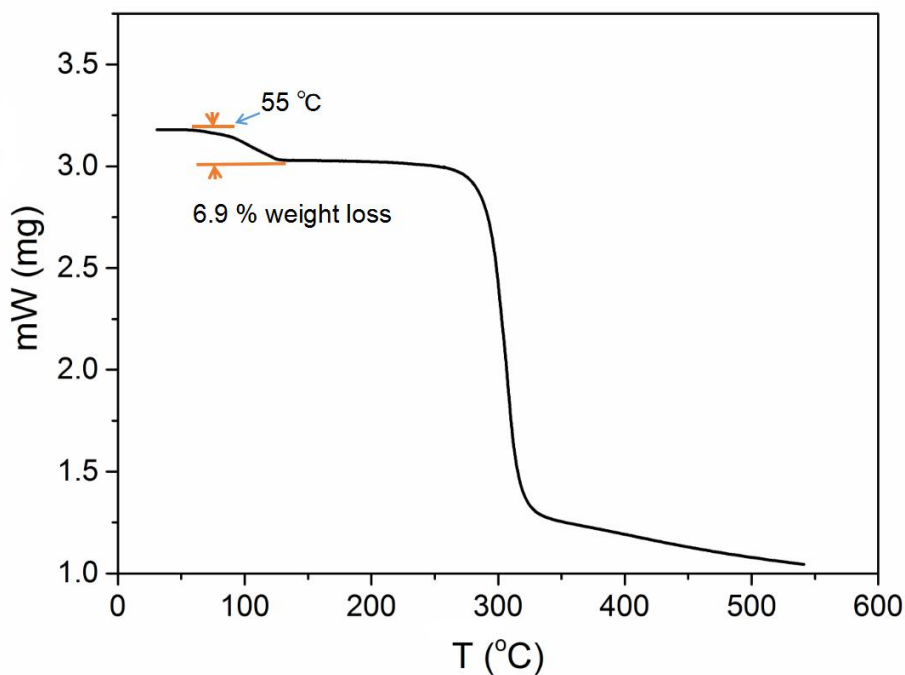

**Figure S30.** Thermogravimetric analysis of desolvated **BrP5 $\alpha$**  after sorption of **DMeF** vapor. The weight loss below 150 °C can be calculated as two **DMeF** molecules per **BrP5** molecule.

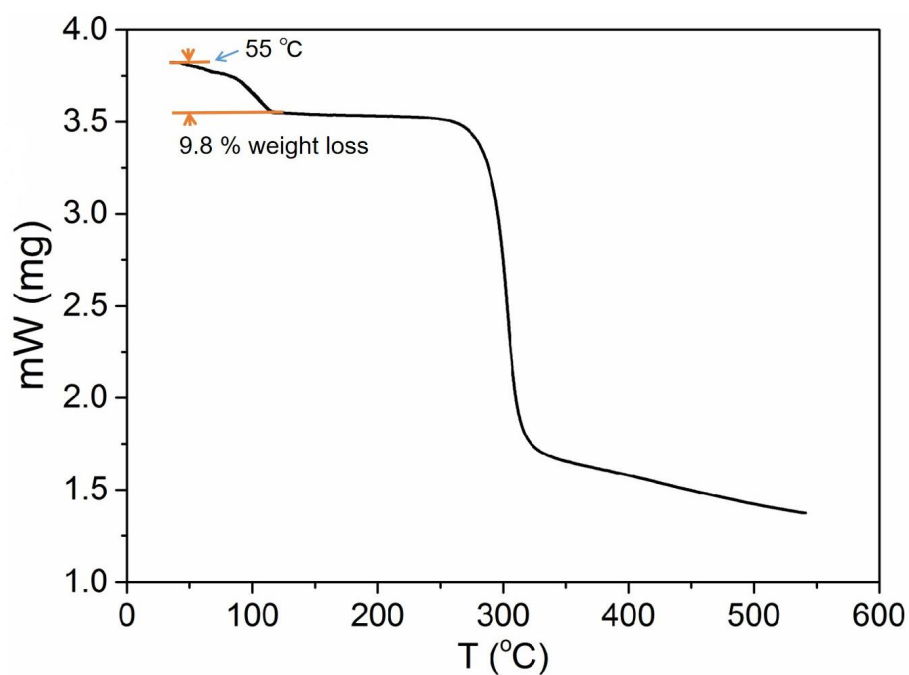

**Figure S31.** Thermogravimetric analysis of desolvated **BrP6 $\beta$**  after sorption of **MeF** vapor. The weight loss below 150 °C can be calculated as two **MeF** molecules per **BrP6** molecule.

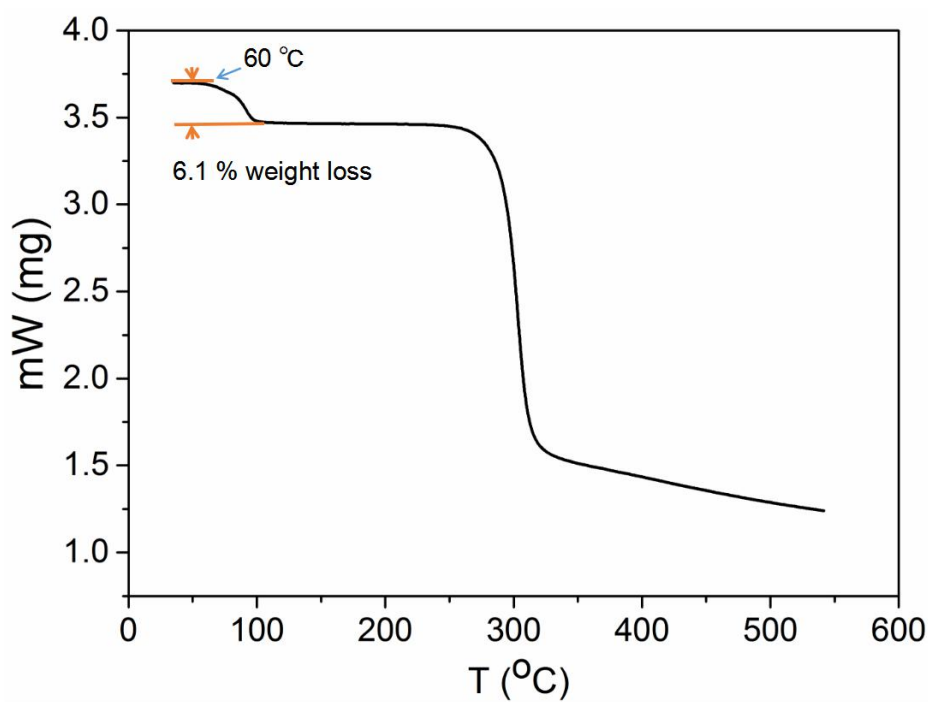

**Figure S32.** Thermogravimetric analysis of desolvated **BrP6 $\beta$**  after sorption of **DMeF** vapor. The weight loss below 150 °C can be calculated as one **DMeF** molecule per **BrP6** molecule.

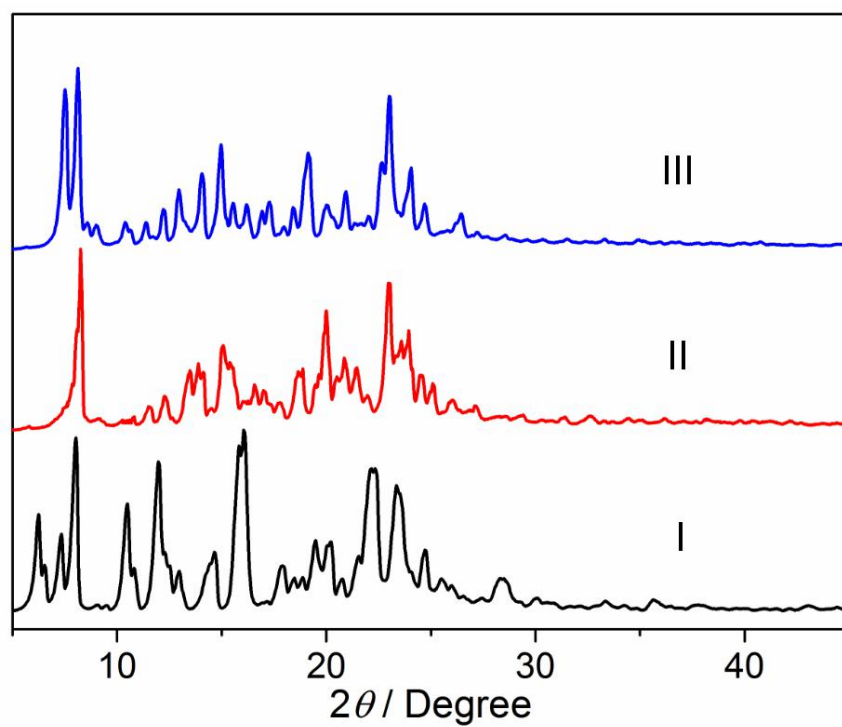

**Figure S33.** Powder X-ray diffraction patterns of **EtP5**: (I) original **EtP5 $\alpha$** ; (II) after adsorption of **MeF** vapor; (III) after adsorption of **DMeF** vapor.

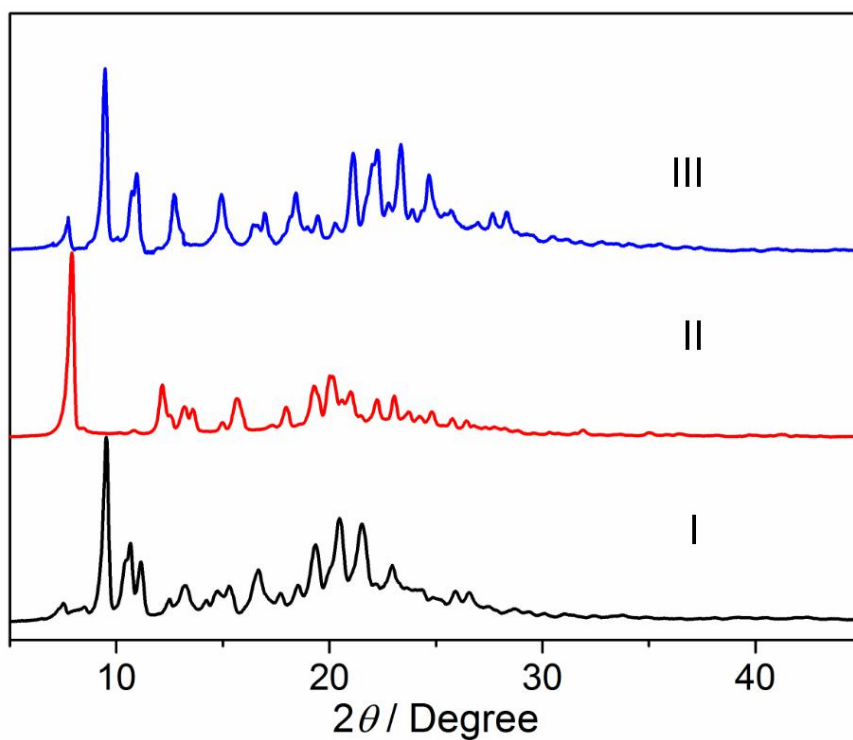

**Figure S34.** Powder X-ray diffraction patterns of **EtP6**: (I) original **EtP6 $\beta$** ; (II) after adsorption of **MeF** vapor; (III) after adsorption of **DMeF** vapor.



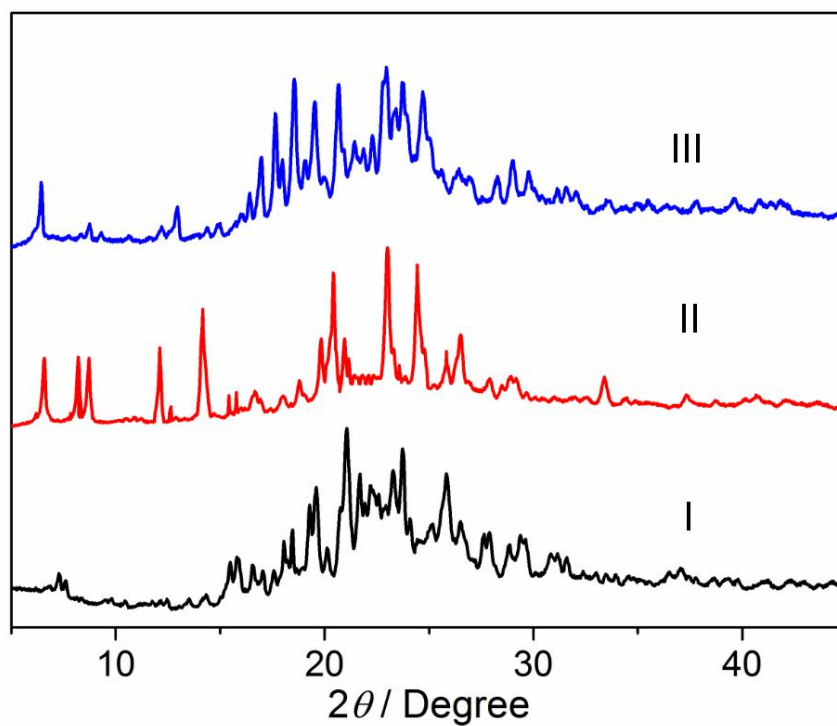

**Figure S35.** Powder X-ray diffraction patterns of **BrP5**: (I) original **BrP5 $\alpha$** ; (II) after adsorption of **MeF** vapor; (III) after adsorption of **DMeF** vapor.

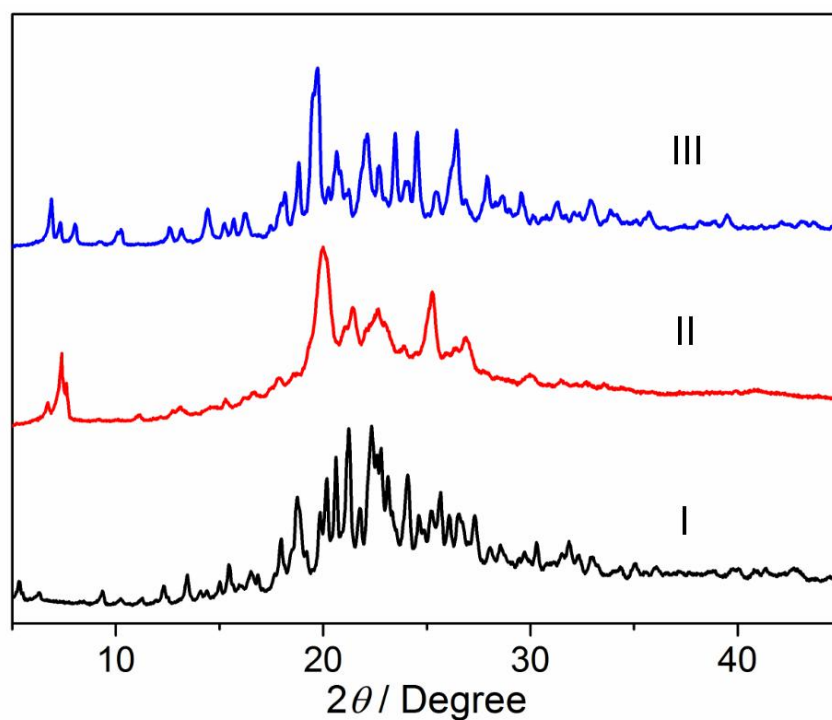

**Figure S36.** Powder X-ray diffraction patterns of **BrP6**: (I) original **BrP6 $\beta$** ; (II) after adsorption of **MeF** vapor (disorder); (III) after adsorption of **DMeF** vapor.

## 5.2. Structural Analyses after Single-Component Vapor Sorption

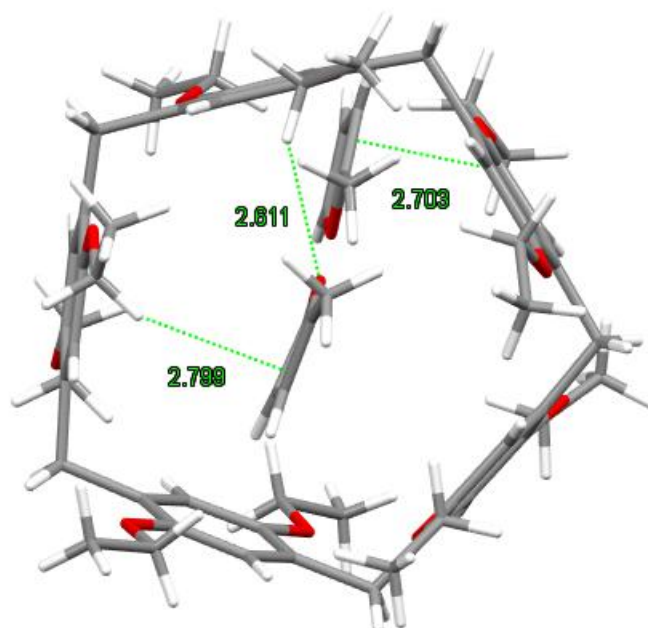

**Figure S37.** Single crystal structure of **(MeF)<sub>2</sub>@EtP5**. H $\cdots$ O distance (Å) and C–H $\cdots$ O angle (deg) of hydrogen bond: 2.611, 145.48; C–H $\cdots$  $\pi$  distances (Å): 2.703, 2.799.

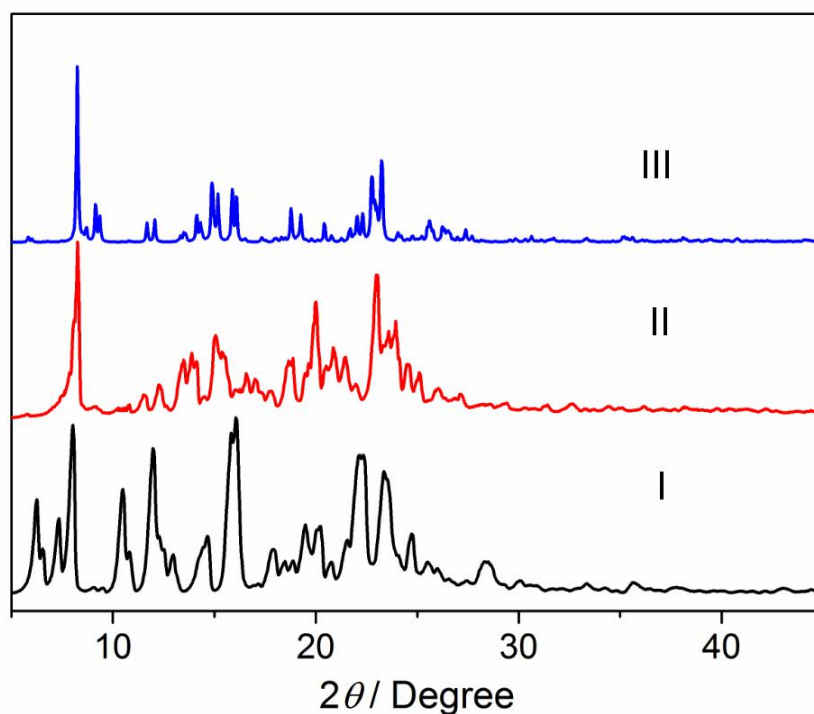

**Figure S38.** Powder X-ray diffraction patterns of **EtP5**: (I) original **EtP5 $\alpha$** ; (II) after adsorption of **MeF** vapor; (III) simulated from single crystal structure of **(MeF)<sub>2</sub>@EtP5**.

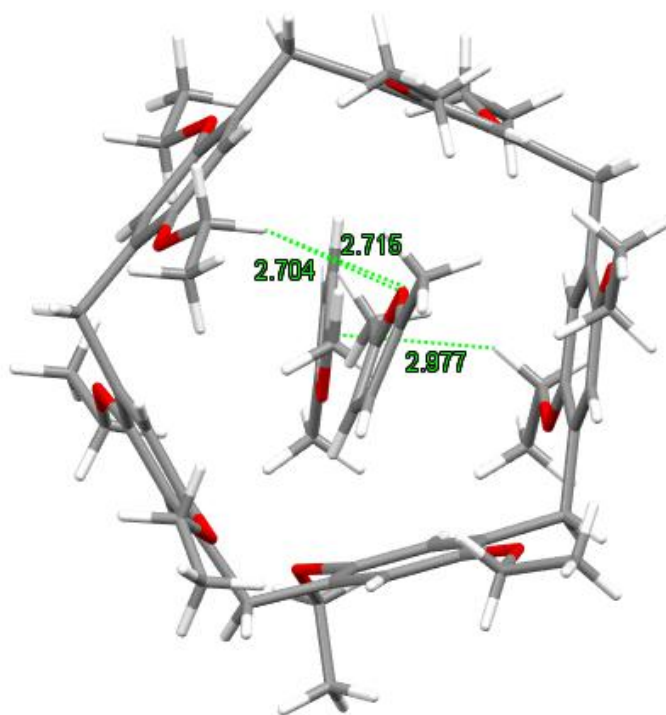

**Figure S39.** Single crystal structure of **(DMeF)<sub>2</sub>@EtP5**. H $\cdots$ O distance (Å) and C–H $\cdots$ O angle (deg) of hydrogen bond: 2.715, 159.70; C–H $\cdots$  $\pi$  distances (Å): 2.704, 2.982.

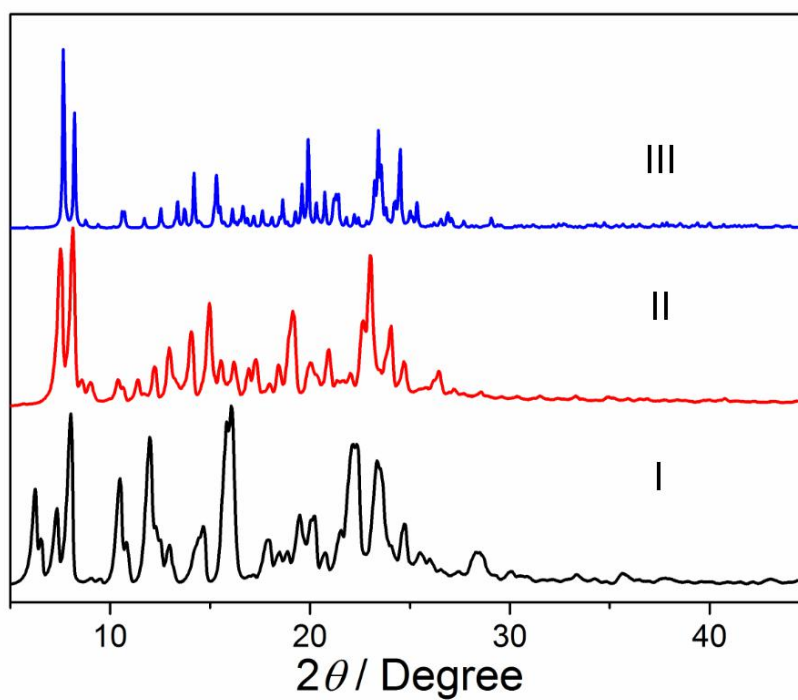

**Figure S40.** Powder X-ray diffraction patterns of **EtP5**: (I) original **EtP5 $\alpha$** ; (II) after adsorption of **DMeF** vapor; (III) simulated from single crystal structure of **(DMeF)<sub>2</sub>@EtP5**.

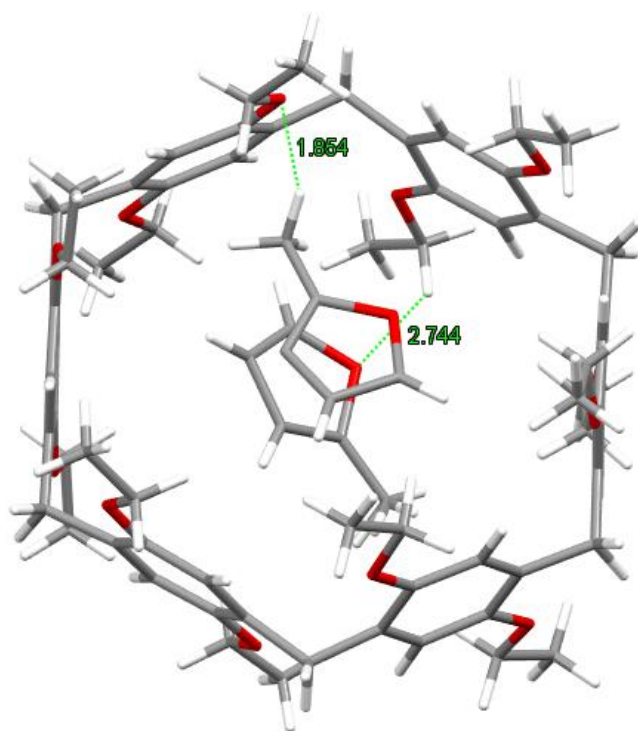

**Figure S41.** Single crystal structure of **(MeF)<sub>2</sub>@EtP6**. H $\cdots$ O distances (Å) and C–H $\cdots$ O angles (deg) of hydrogen bonds: 1.854, 150.46; 2.744, 134.85.

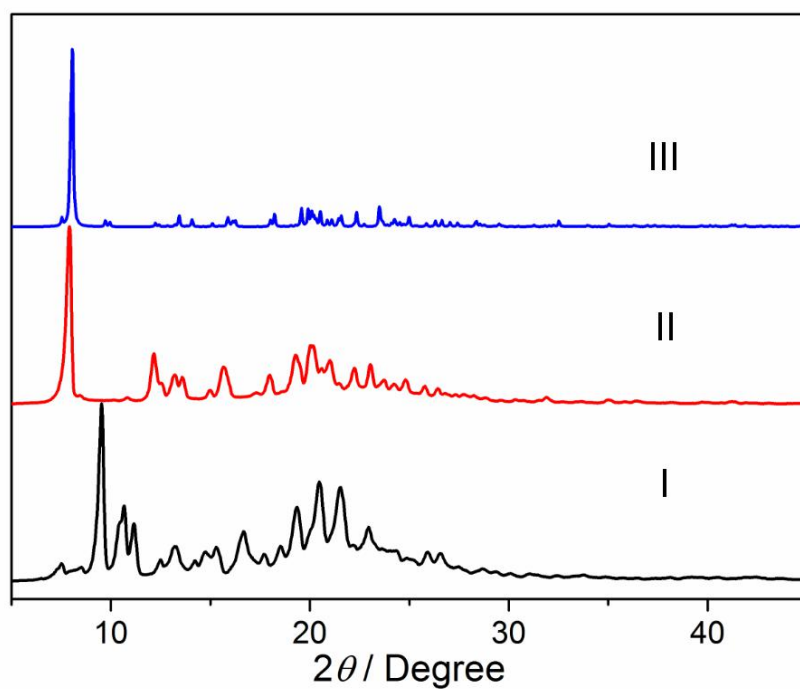

**Figure S42.** Powder X-ray diffraction patterns of **EtP6**: (I) original **EtP6 $\beta$** ; (II) after adsorption of **MeF** vapor; (III) simulated from single crystal structure of **(MeF)<sub>2</sub>@EtP6**.

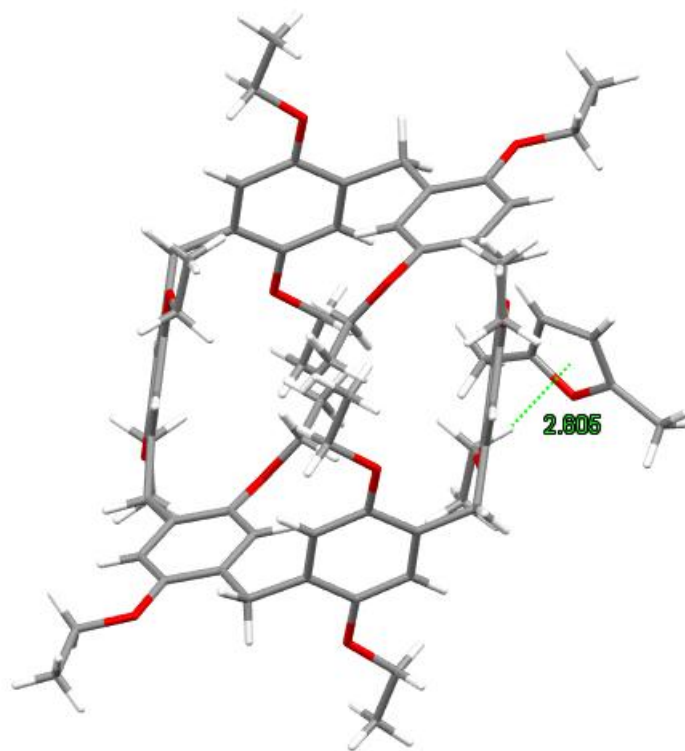

**Figure S43.** Single crystal structure of **DMeF@EtP6**. C–H··· $\pi$  distance (Å): 2.605.

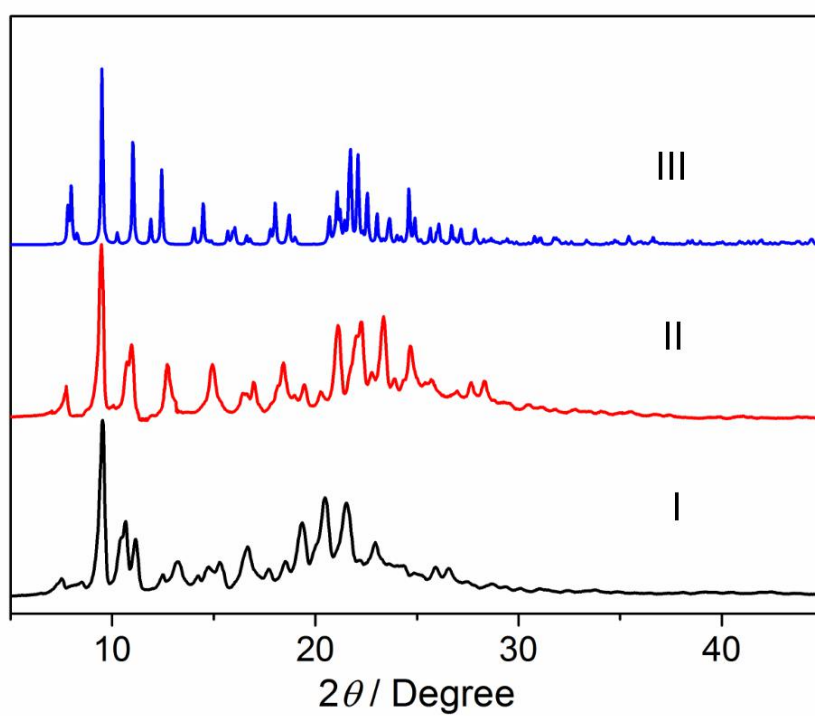

**Figure S44.** Powder X-ray diffraction patterns of **EtP6**: (I) original **EtP6 $\beta$** ; (II) after adsorption of **DMeF** vapor; (III) simulated from single crystal structure of **DMeF@EtP6**.

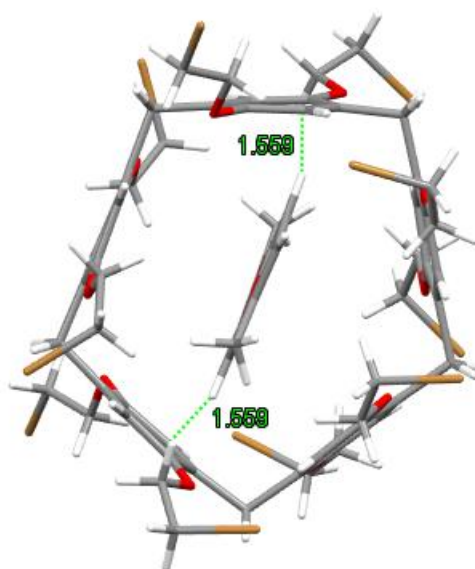

**Figure S45.** Single crystal structure of (MeF)<sub>2</sub>@BrP5. C-H... $\pi$  distances (Å): 1.559, 1.559.

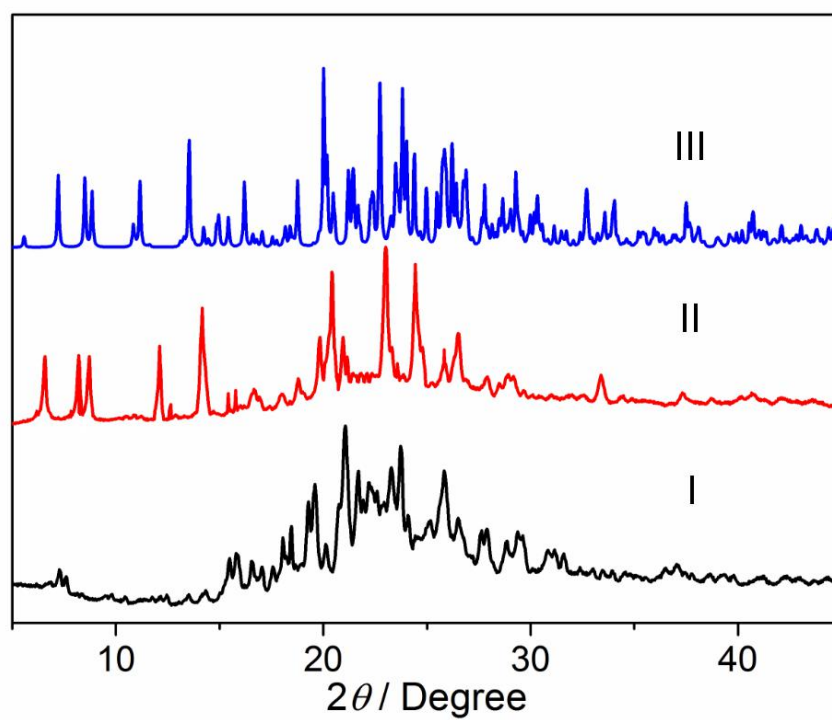

**Figure S46.** Powder X-ray diffraction patterns of BrP5: (I) original BrP5 $\alpha$ ; (II) after adsorption of MeF vapor; (III) simulated from single crystal structure of (MeF)<sub>2</sub>@BrP5.

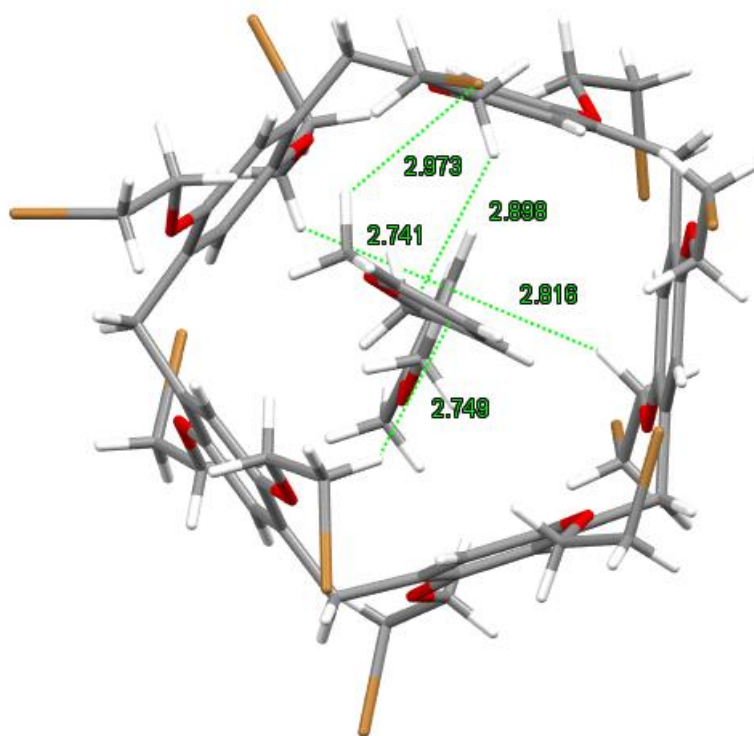

**Figure S47.** Single crystal structure of **(DMeF)<sub>2</sub>@BrP5**. H $\cdots$ Br distance (Å) and C–H $\cdots$ Br angle (deg) of hydrogen bond: 2.973, 128.65; C–H $\cdots$  $\pi$  distances (Å): 2.741, 2.749, 2.816, 2.898.

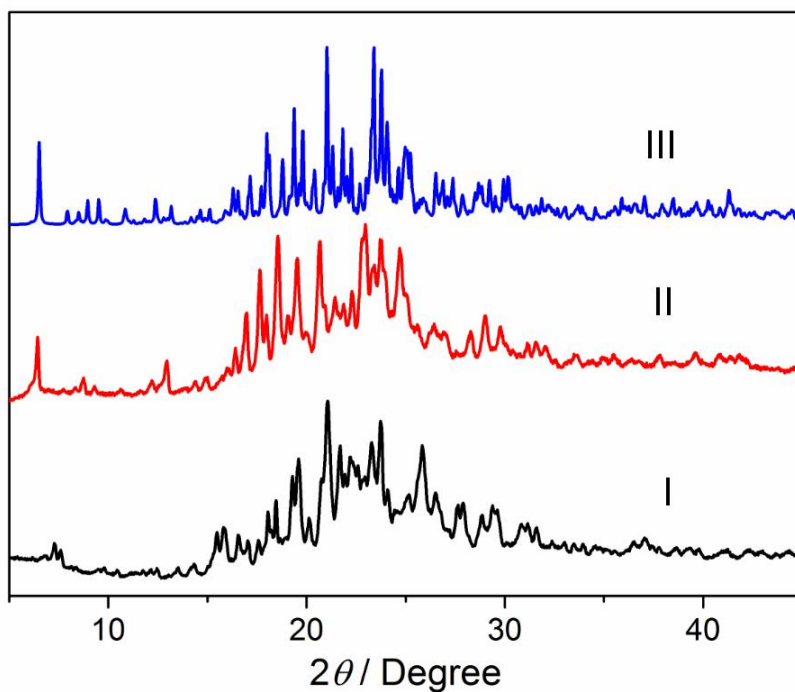

**Figure S48.** Powder X-ray diffraction patterns of **BrP5**: (I) original **BrP5 $\alpha$** ; (II) after adsorption of **DMeF** vapor; (III) simulated from single crystal structure of **(DMeF)<sub>2</sub>@BrP5**.



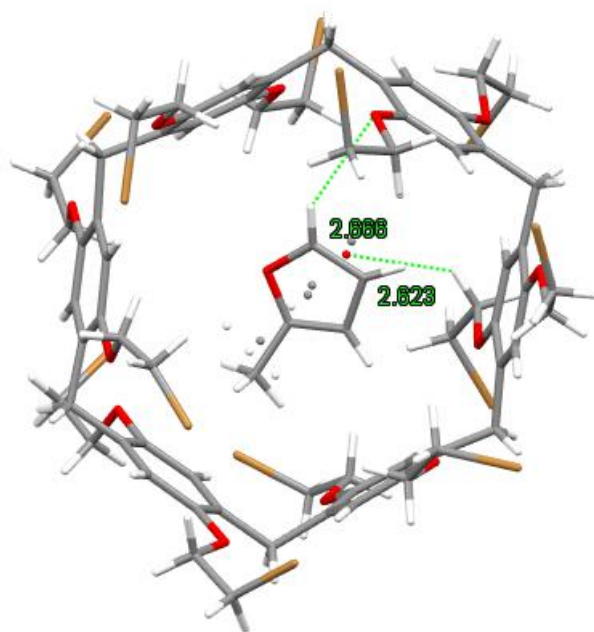

**Figure S49.** Single crystal structure of  $(\text{MeF})_2@ \text{BrP6}$  (disorder).  $\text{H} \cdots \text{O}$  distances (Å) and  $\text{C}-\text{H} \cdots \text{O}$  angles (deg) of hydrogen bonds: 2.623, 132.93; 2.666, 142.14.

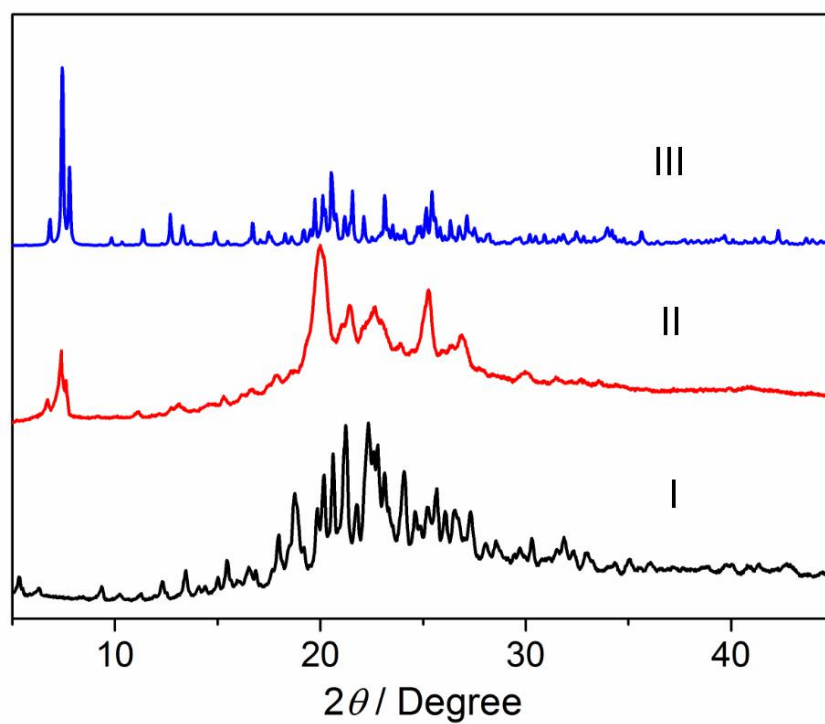

**Figure S50.** Powder X-ray diffraction patterns of  $\text{BrP6}$ : (I) original  $\text{BrP6}\beta$ ; (II) after adsorption of  $\text{MeF}$  vapor; (III) simulated from single crystal structure of  $(\text{MeF})_2@ \text{BrP6}$ .



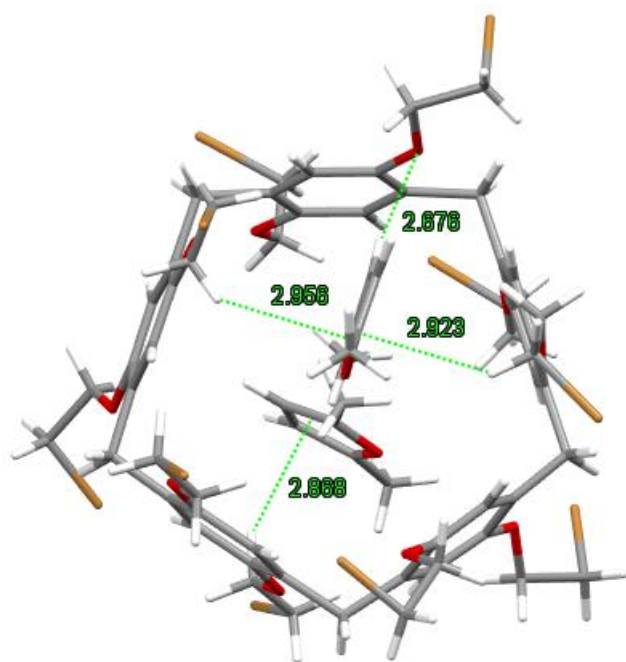

**Figure S51.** Single crystal structure of **(DMeF)<sub>2</sub>@BrP6**. H $\cdots$ O distance (Å) and C–H $\cdots$ O angle (deg) of hydrogen bond: 2.676, 172.77; C–H $\cdots$  $\pi$  distances (Å) : 2.868, 2.923, 2.956.

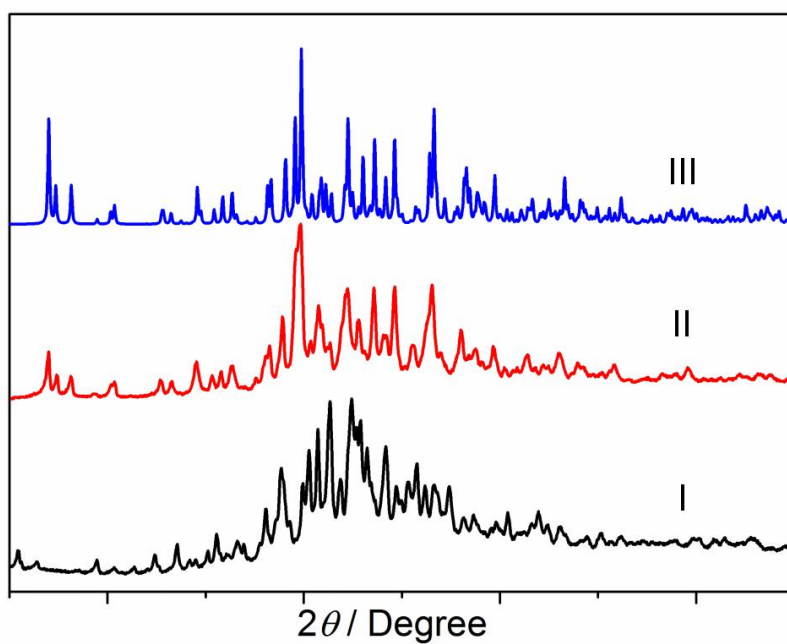

**Figure S52.** Powder X-ray diffraction patterns of **BrP6**: (I) original **BrP6 $\beta$** ; (II) after adsorption of **DMeF** vapor; (III) simulated from single crystal structure of **DMeF@BrP6**.

### 5.3. Uptake from **MeF** and **DMeF** in **EtP5 $\alpha$**

For each vapor-phase mixture experiment, an open 5.00 mL vial containing 20.00 mg of guest-free **EtP5 $\alpha$**  adsorbent was placed in a sealed 20.00 mL vial containing 1.00 mL of a 50:50 v/v **MeF** and **DMeF** mixture. The relative uptake of **MeF** or **DMeF** by **EtP5 $\alpha$**  was measured by heating the crystals to release the adsorbed vapor using gas chromatography. Before measurements, the crystals were heated at 60 °C to remove the surface-physically adsorbed vapor.

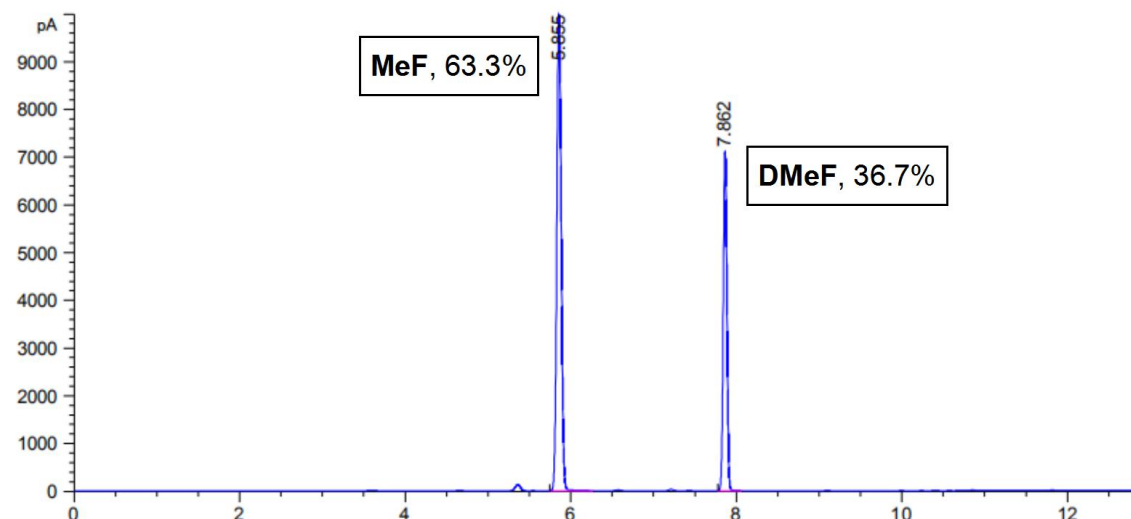

**Figure S53.** Relative uptake of the **MeF/DMeF** mixture (v:v = 50:50) adsorbed in **EtP5 $\alpha$**  after 24 hours using gas chromatography.

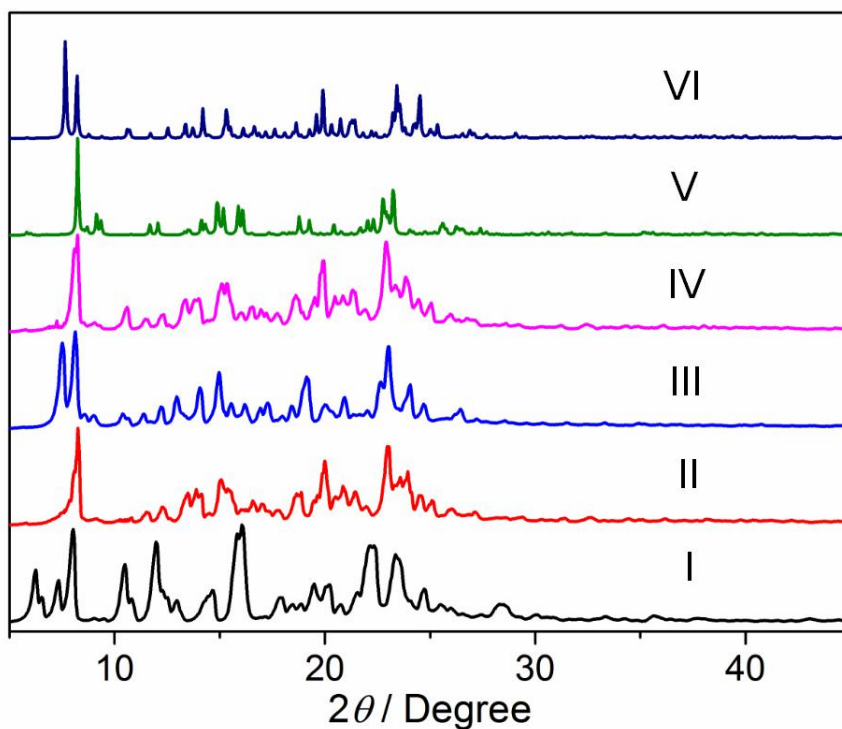

**Figure S54.** Powder X-ray diffraction patterns of **EtP5**: (I) original **EtP5**; (II) after adsorption of **MeF** vapor; (III) after adsorption of **DMeF** vapor; (IV) after adsorption of a 50:50 v/v **MeF** and **DMeF** mixture vapor; (V) simulated from single crystal structure of **(MeF)<sub>2</sub>@EtP5**; (VI) simulated from single crystal structure of **(DMeF)<sub>2</sub>@EtP5**.

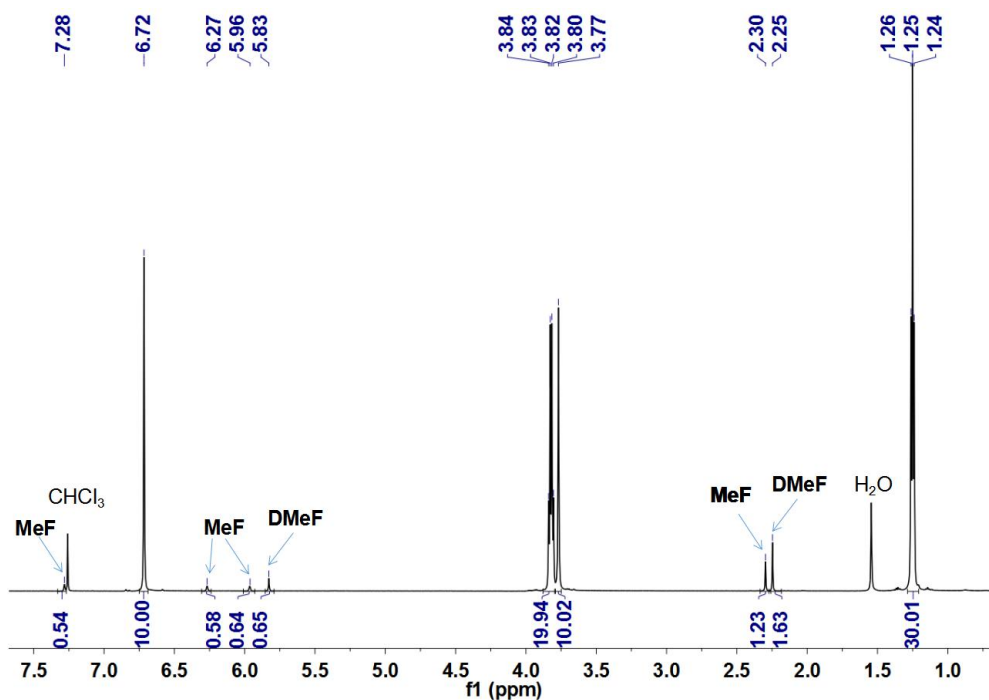

**Figure S55.**  $^1\text{H}$  NMR spectrum (600 MHz, chloroform-*d*, 298 K) of **EtP5** after adsorption of a 50:50 v/v **MeF** and **DMeF** mixture vapor.

#### 5.4. Uptake from **MeF** and **DMeF** in **EtP6 $\beta$**

For each vapor-phase mixture experiment, an open 5.00 mL vial containing 20.00 mg of guest-free **EtP6 $\beta$**  adsorbent was placed in a sealed 20.00 mL vial containing 1.00 mL of a 50:50 v/v **MeF** and **DMeF** mixture. The relative uptake of **MeF** or **DMeF** by **EtP6 $\beta$**  was measured by heating the crystals to release the adsorbed vapor using gas chromatography. Before measurements, the crystals were heated at 60 °C to remove the surface-physically adsorbed vapor.

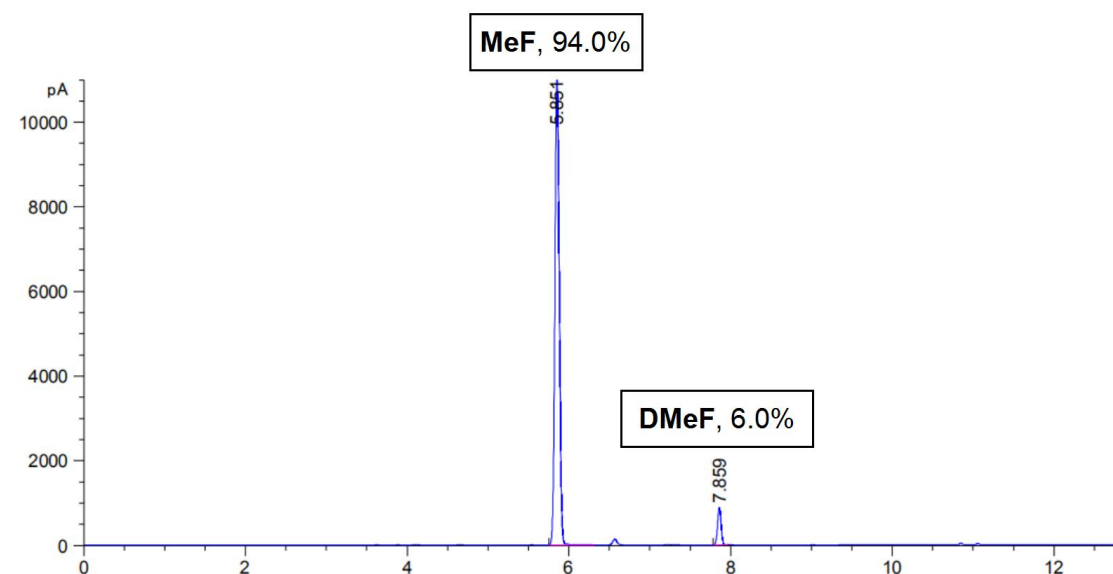

**Figure S56.** Relative uptake of the **MeF/DMeF** mixture (v:v = 50:50) adsorbed in **EtP6 $\beta$**  after 24 hours using gas chromatography.

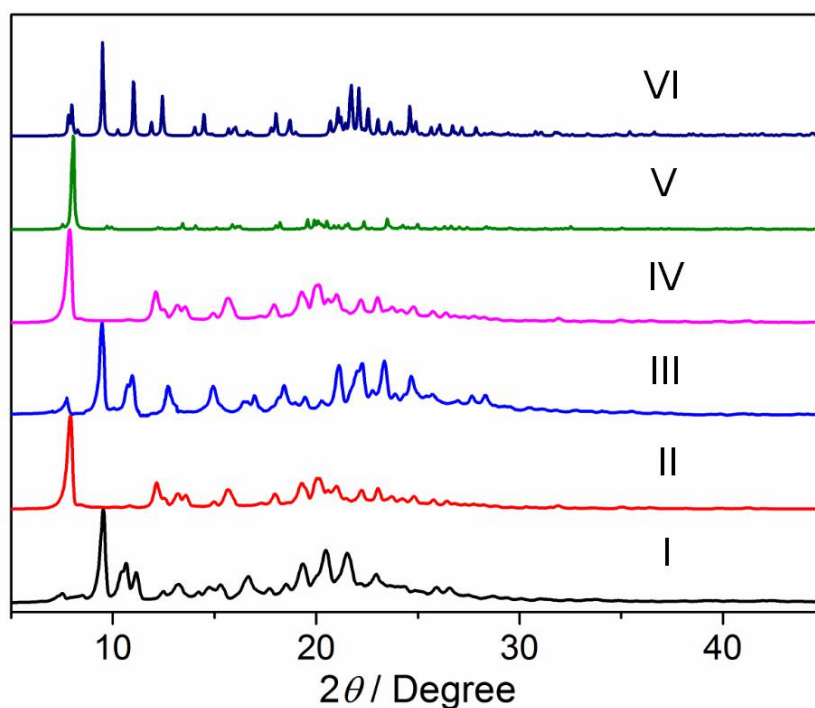

**Figure S57.** Powder X-ray diffraction patterns of **EtP6**: (I) original **EtP6 $\beta$** ; (II) after adsorption of **MeF** vapor; (III) after adsorption of **DMeF** vapor; (IV) after adsorption of a 50:50 v/v **MeF** and **DMeF** mixture vapor; (V) simulated from single crystal structure of (**MeF**)<sub>2</sub>@**EtP6**; (VI) simulated from single crystal structure of **DMeF**@**EtP6**.

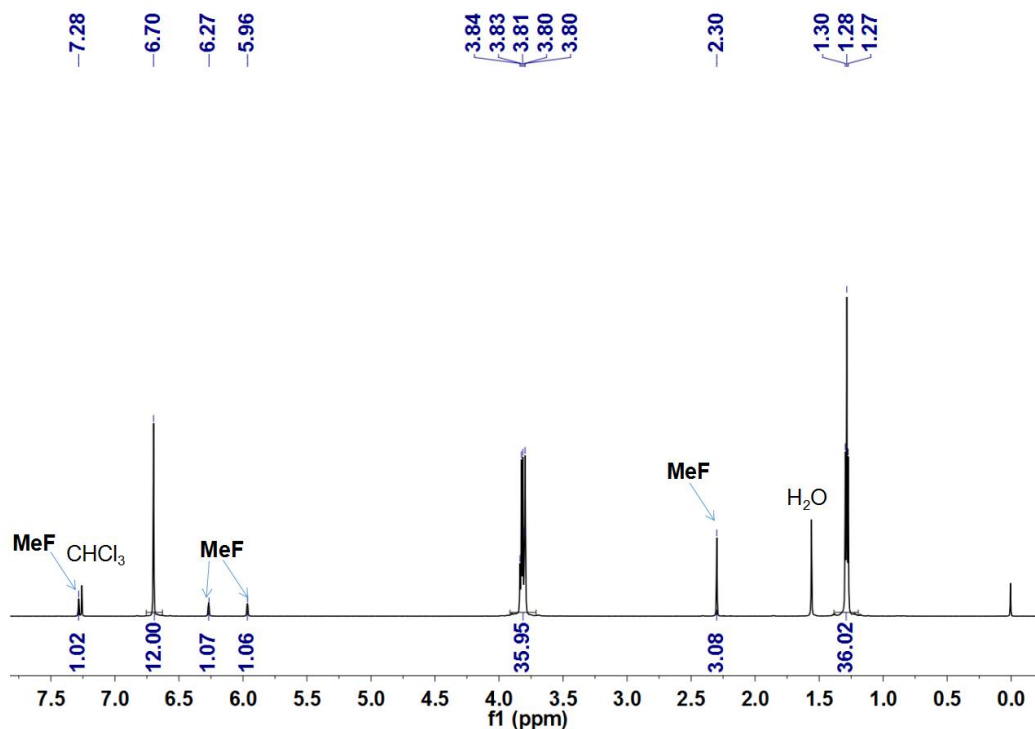

**Figure S58.** <sup>1</sup>H NMR spectrum (600 MHz, chloroform-*d*, 298 K) of **EtP6 $\beta$**  after adsorption of a 50:50 v/v **MeF** and **DMeF** mixture vapor.

### 5.5. Uptake from **MeF** and **DMeF** in **BrP5 $\alpha$**

For each vapor-phase mixture experiment, an open 5.00 mL vial containing 20.00 mg of guest-free **BrP5 $\alpha$**  adsorbent was placed in a sealed 20.00 mL vial containing 1.00 mL of a 50:50 v/v **MeF** and **DMeF** mixture. The relative uptake of **MeF** or **DMeF** by **BrP5 $\alpha$**  was measured by heating the crystals to release the adsorbed vapor using gas chromatography. Before measurements, the crystals were heated at 60 °C to remove the surface-physically adsorbed vapor.

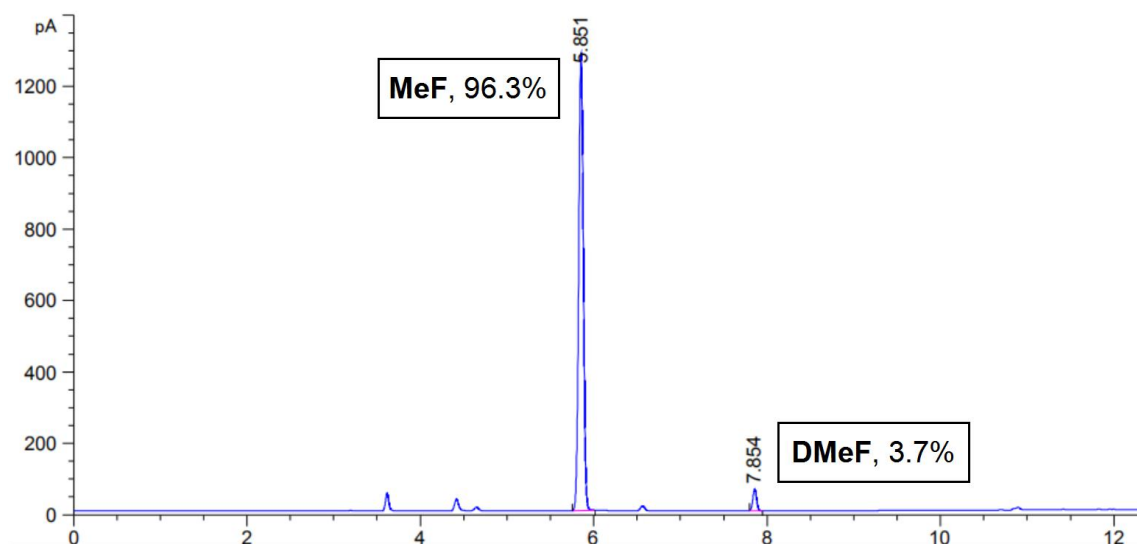

**Figure S59.** Relative uptake of the **MeF/DMeF** mixture ( $v:v = 50:50$ ) adsorbed in **BrP5 $\alpha$**  after 24 hours using gas chromatography.

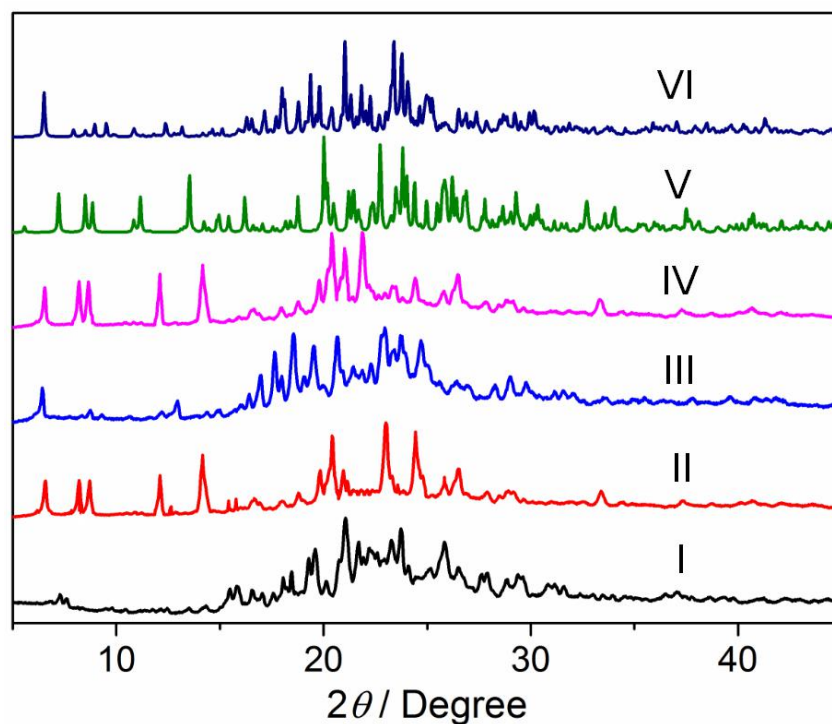

**Figure S60.** Powder X-ray diffraction patterns of **BrP5**: (I) original **BrP5 $\alpha$** ; (II) after adsorption of **MeF** vapor; (III) after adsorption of **DMeF** vapor; (IV) after adsorption of a 50:50  $v/v$  **MeF** and **DMeF** mixture vapor; (V) simulated from single crystal structure of **(MeF) $_2$ @BrP5**; (VI) simulated from single crystal structure of **(DMeF) $_2$ @BrP5**.

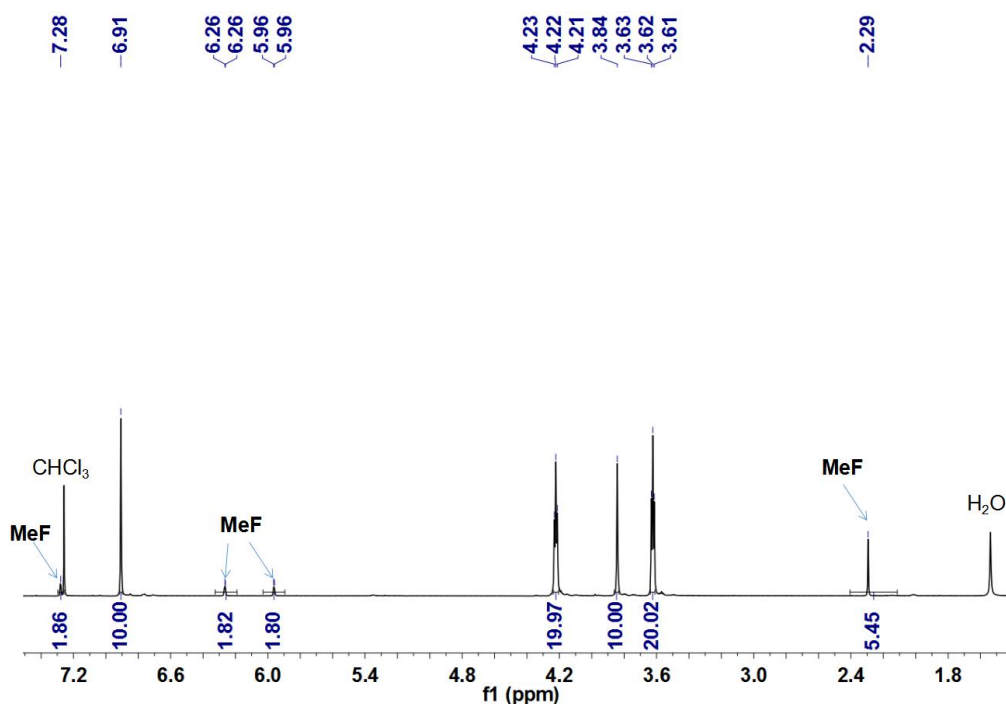

**Figure S61.** <sup>1</sup>H NMR spectrum (600 MHz, chloroform-*d*, 298 K) of **BrP5α** after adsorption of a 50:50 v/v **MeF** and **DMeF** mixture vapor.

#### 5.6. Uptake from **MeF** and **DMeF** in **BrP6β**

For each vapor-phase mixture experiment, an open 5.00 mL vial containing 20.00 mg of guest-free **BrP6β** adsorbent was placed in a sealed 20.00 mL vial containing 1.00 mL of a 50:50 v/v **MeF** and **DMeF** mixture. The relative uptake of **MeF** or **DMeF** by **BrP6β** was measured by heating the crystals to release the adsorbed vapor using gas chromatography. Before measurements, the crystals were heated at 60 °C to remove the surface-physically adsorbed vapor.

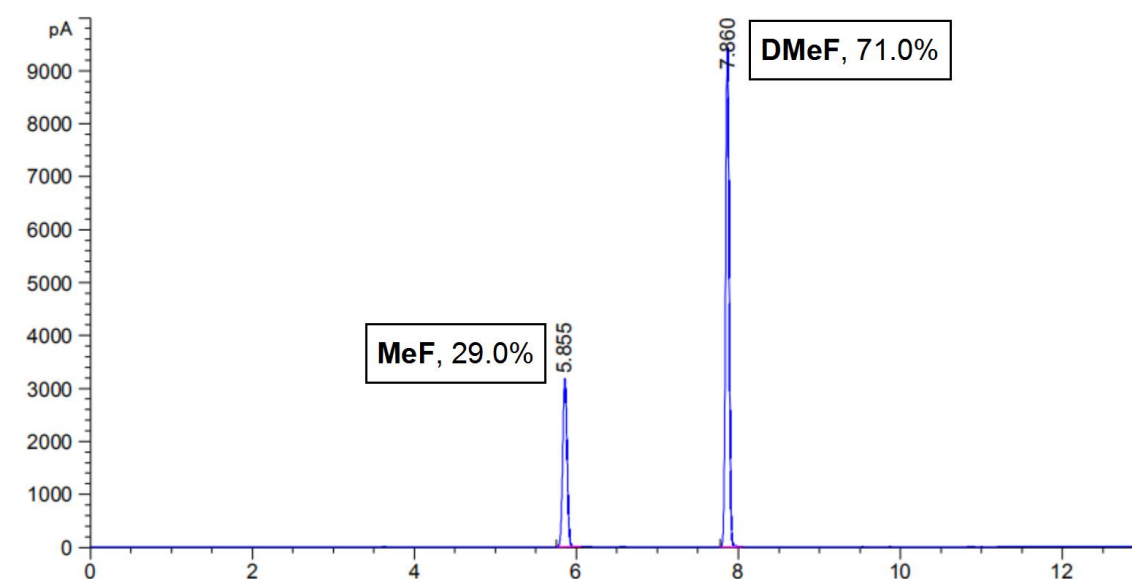

**Figure S62.** Relative uptake of the **MeF/DMeF** mixture ( $v:v = 50:50$ ) adsorbed in **BrP6 $\beta$**  after 24 hours using gas chromatography.

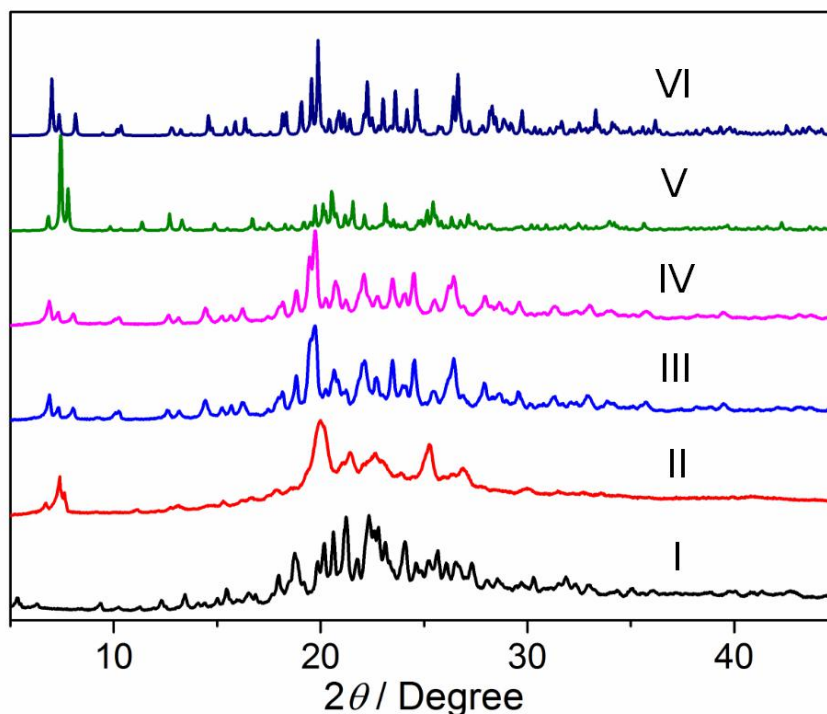

**Figure S63.** Powder X-ray diffraction patterns of **BrP6**: (I) original **BrP6 $\beta$** ; (II) after adsorption of **MeF** vapor; (III) after adsorption of **DMeF** vapor; (IV) after adsorption of a 50:50  $v/v$  **MeF** and **DMeF** mixture vapor; (V) simulated from single crystal structure of **(MeF)<sub>2</sub>@BrP6**; (VI) simulated from single crystal structure of **DMeF@BrP6**.



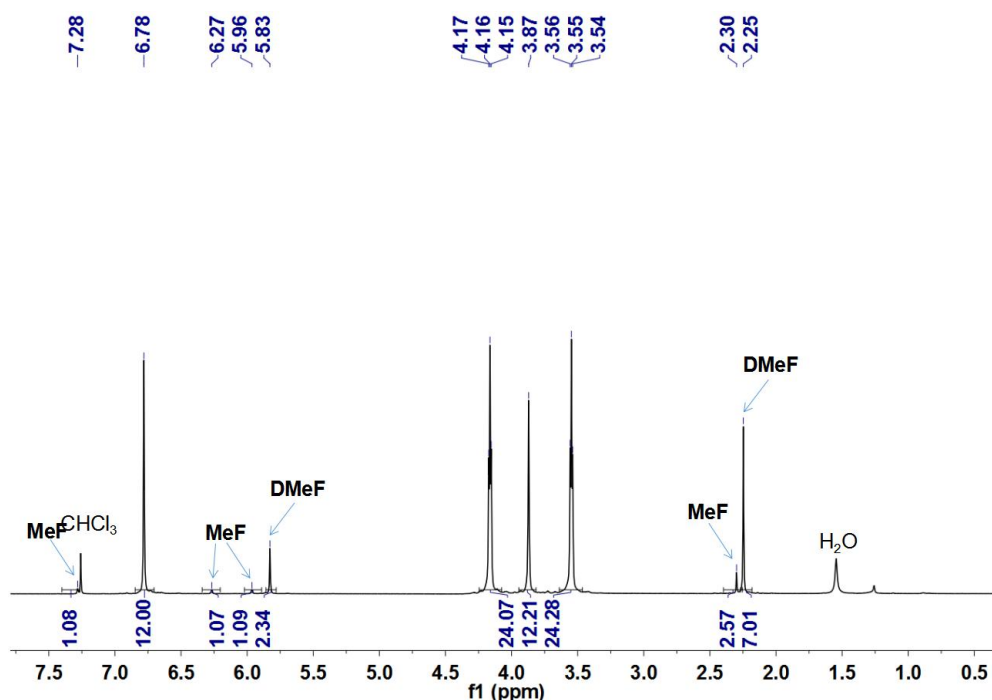

**Figure S64.**  $^1\text{H}$  NMR spectrum (600 MHz, chloroform- $d$ , 298 K) of **BrP6 $\beta$**  after adsorption of a 50:50 v/v **MeF** and **DMeF** mixture vapor.

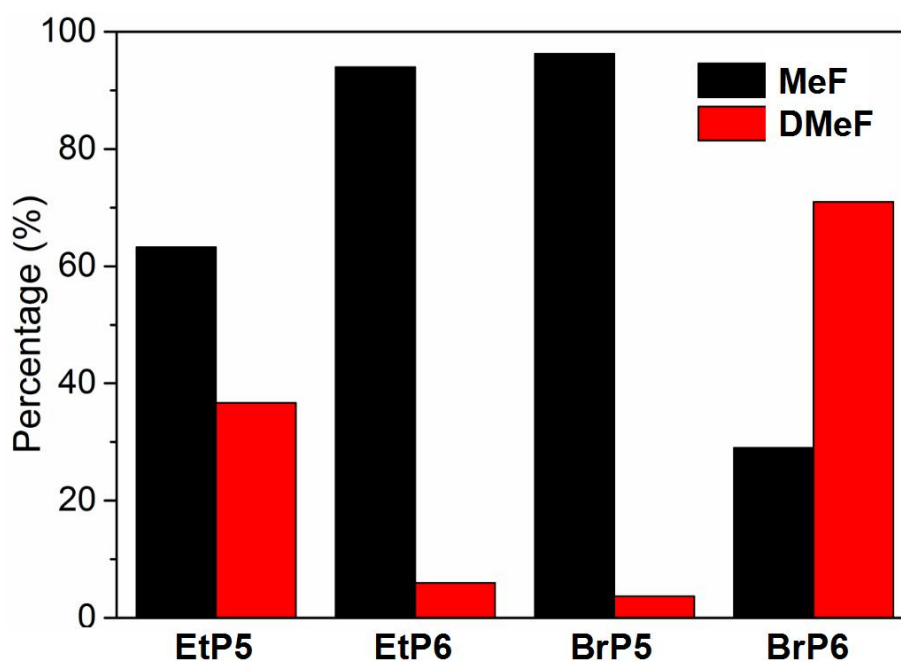

**Figure S65.** Relative uptake of the **MeF/DMeF** mixture vapor (v/v = 50:50) adsorbed in crystals of four pillararenes after 24 hours by GC.

## 6. Recyclability of experiments

### 6.1. Recyclability of **EtP6 $\beta$** crystals

An open 5.00 mL vial containing 20.00 mg of **(MeF) $_2$ @EtP6** was desolvated under vacuum at 60 °C overnight. The resultant crystals were characterized by TGA, PXRD and  $^1\text{H}$  NMR.

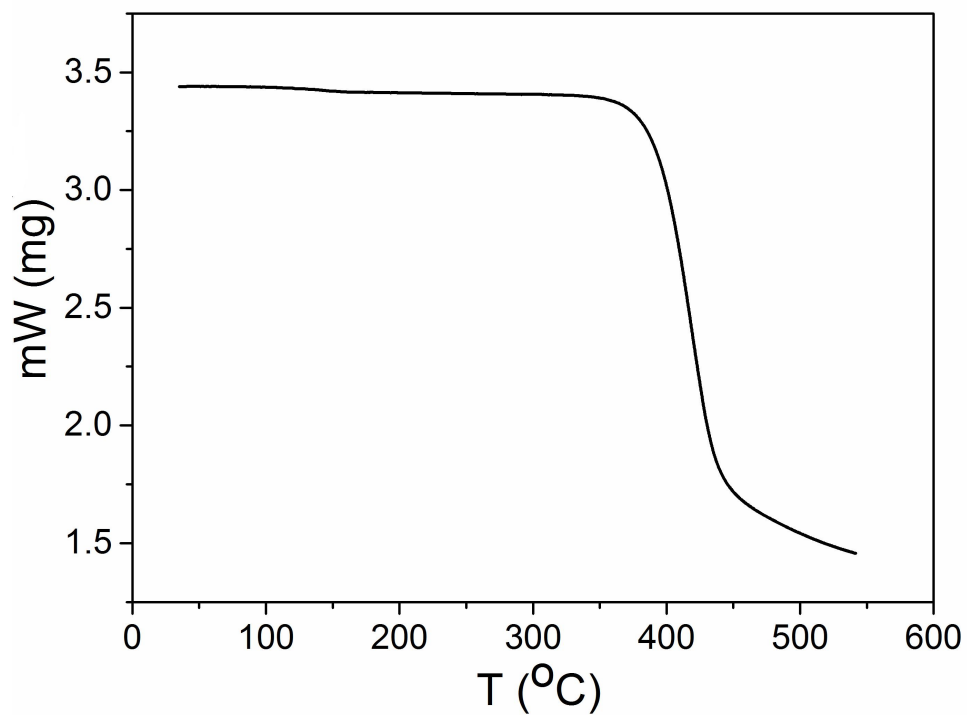

**Figure S66.** Thermogravimetric analysis of desolvated  $(\text{MeF})_2@\text{EtP6}$  upon removal of  $\text{MeF}$ .

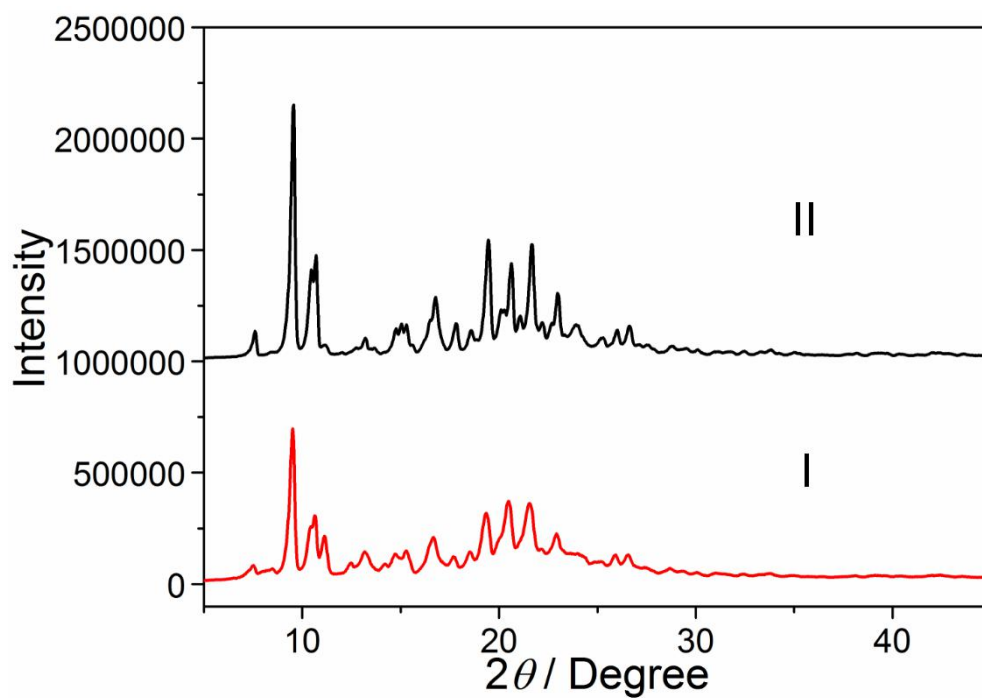

**Figure S67.** Powder X-ray diffraction patterns of  $\text{EtP6}$ : (I)  $\text{EtP6}\beta$ ; (II) desolvated  $(\text{MeF})_2@\text{EtP6}$ . This means that upon removal of  $\text{MeF}$ ,  $(\text{MeF})_2@\text{EtP6}$  transforms back to  $\text{EtP6}\beta$ .

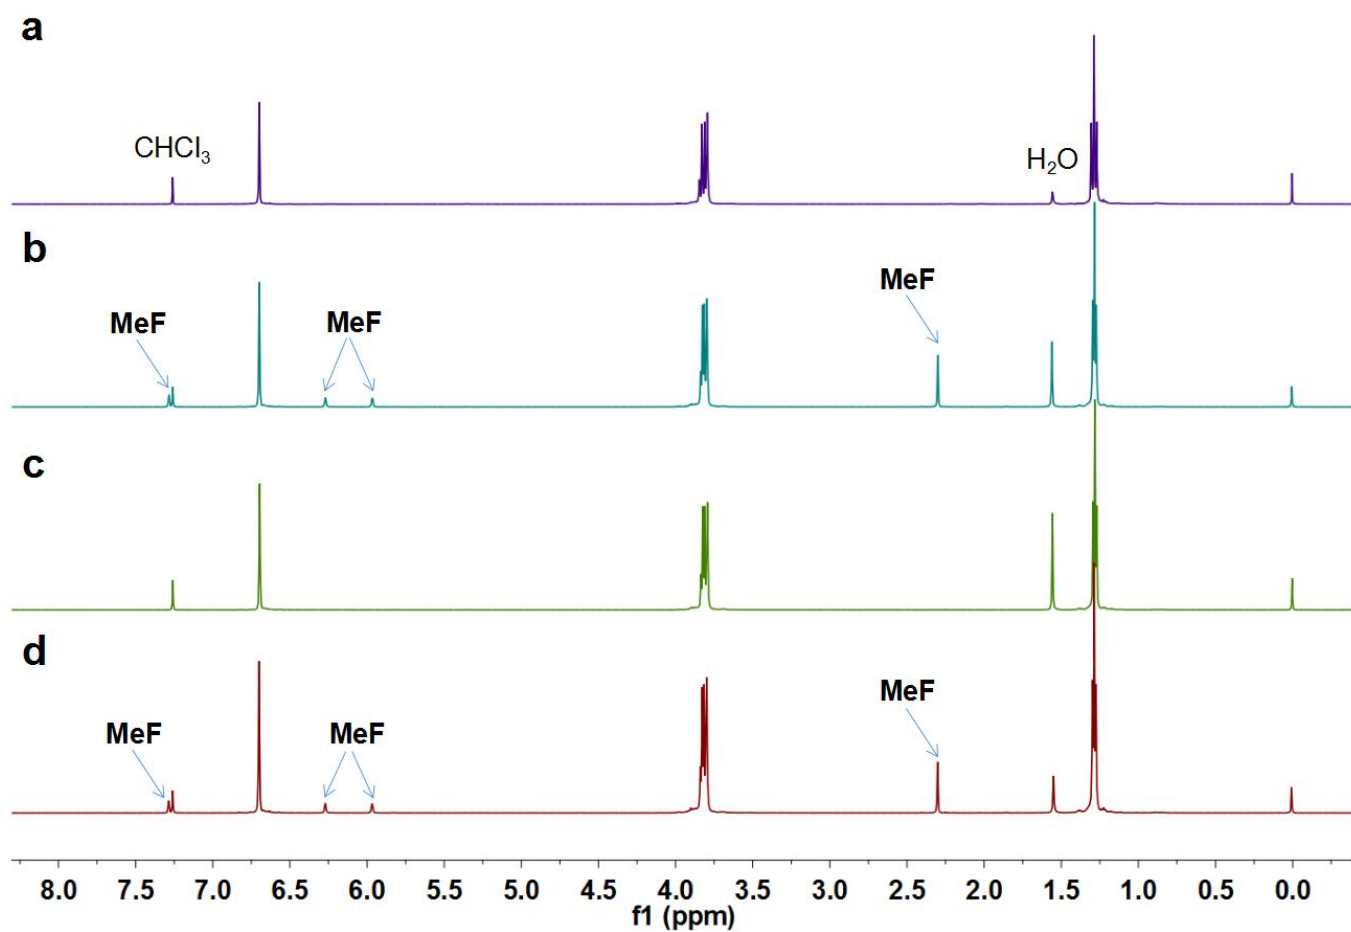

**Figure S68.**  $^1\text{H}$  NMR spectra (400 MHz, chloroform- $d$ , 298 K): (a) original **EtP6 $\beta$** ; (b) **EtP6 $\beta$**  after adsorption of **EtP6** vapor; (c) **(MeF) $_2$ @EtP6** after removal of **MeF**; (d) desolvated **(MeF) $_2$ @EtP6** after adsorption of **MeF** vapor.

## 6.2. Recyclability of **BrP5a** crystals

An open 5.00 mL vial containing 20.00 mg of **(MeF) $_2$ @BrP5** was desolvated under vacuum at 60 °C overnight. The resultant crystals were characterized by TGA, PXRD and  $^1\text{H}$  NMR.

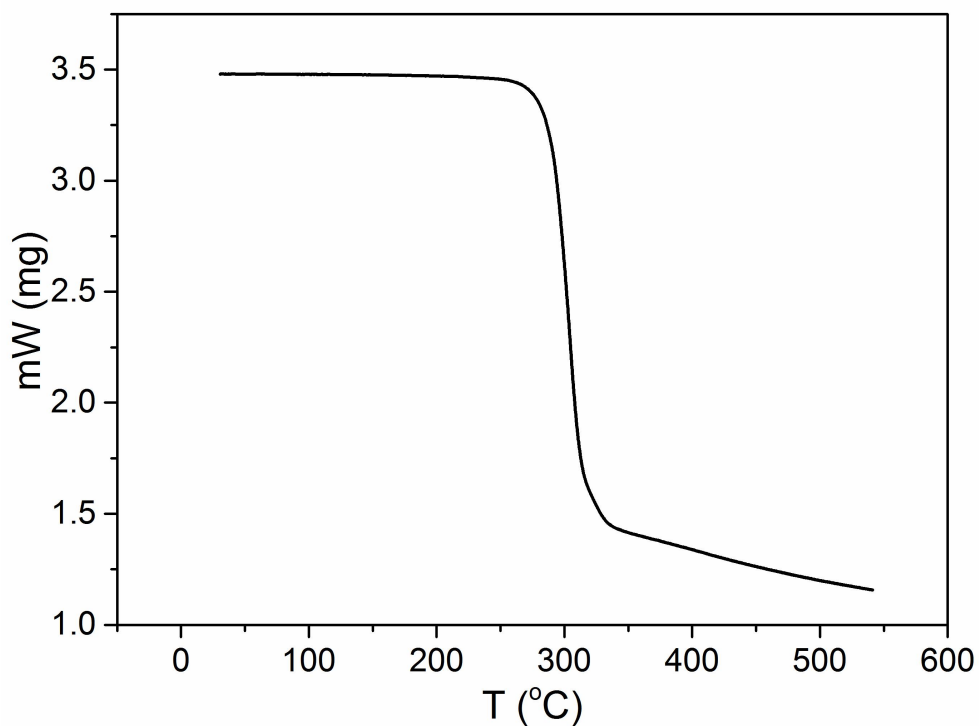

**Figure S69.** Thermogravimetric analysis of desolvated  $(\text{MeF})_2@\text{BrP5}$  upon removal of **MeF**.

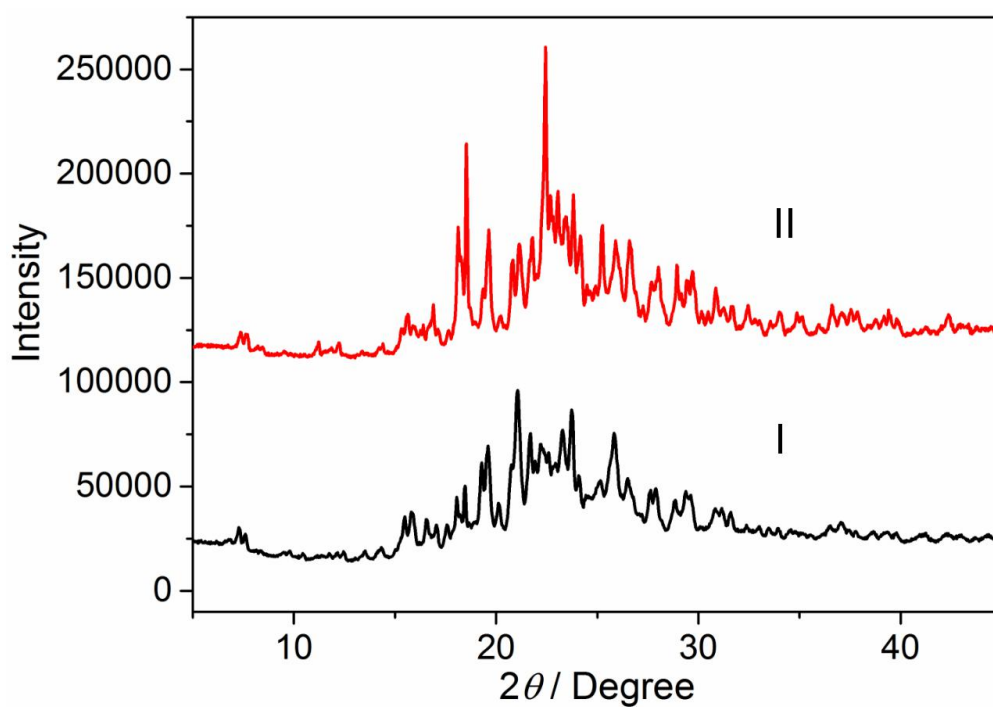

**Figure S70.** Powder X-ray diffraction patterns of **BrP5**: (I) **BrP5 $\alpha$** ; (II) desolvated  $(\text{MeF})_2@\text{BrP5}$ . This means that upon removal of **MeF**,  $(\text{MeF})_2@\text{BrP5}$  transforms back to **BrP5 $\alpha$** .

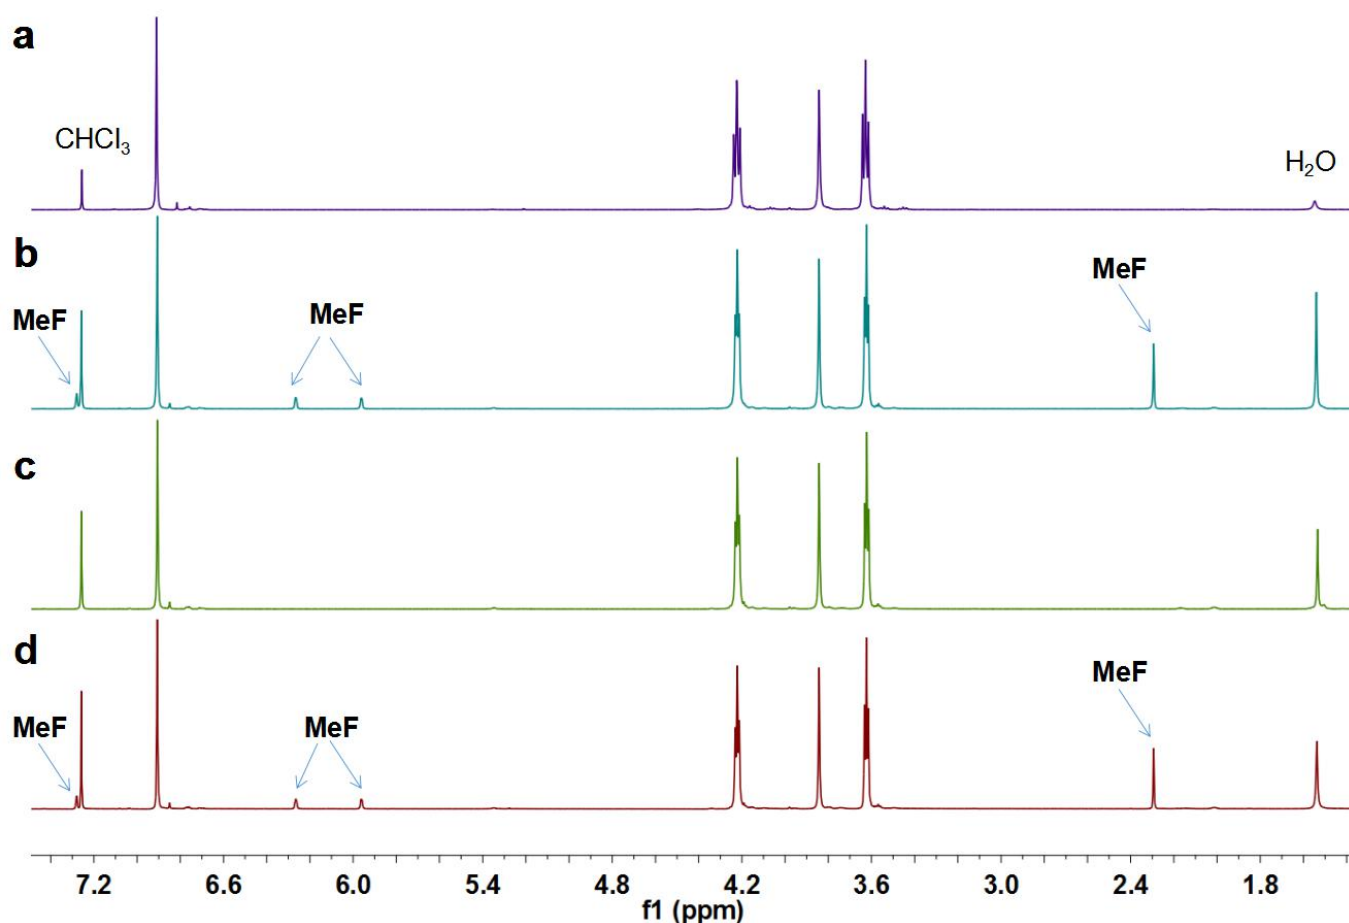

**Figure S71.**  $^1\text{H}$  NMR spectra (400 MHz, chloroform- $d$ , 298 K): (a) original **BrP5 $\alpha$** ; (b) **BrP5 $\alpha$**  after adsorption of **MeF** vapor; (c) **(MeF) $_2$ @BrP5** after removal of **MeF**; (d) desolvated **(MeF) $_2$ @BrP5** after adsorption of **MeF** vapor.

## 7. Other Vapor-Phase Adsorption cases

### 7.1 Adsorption of 90:10 v/v **MeF** and **DMeF** mixture vapor

For each vapor-phase mixture experiment, an open 5.00 mL vial containing 20.00 mg of guest-free **EtP6 $\beta$**  or **BrP5 $\alpha$**  adsorbent was placed in a sealed 20.00 mL vial containing 1.00 mL of a 90:10 v/v **MeF** and **DMeF** mixture. The relative uptake of **MeF** or **DMeF** by **EtP6 $\beta$**  or **BrP5 $\alpha$**  was measured by heating the crystals to release the adsorbed vapor using gas chromatography. Before measurements, the crystals were heated at 60 °C to remove the surface-physically adsorbed vapor.

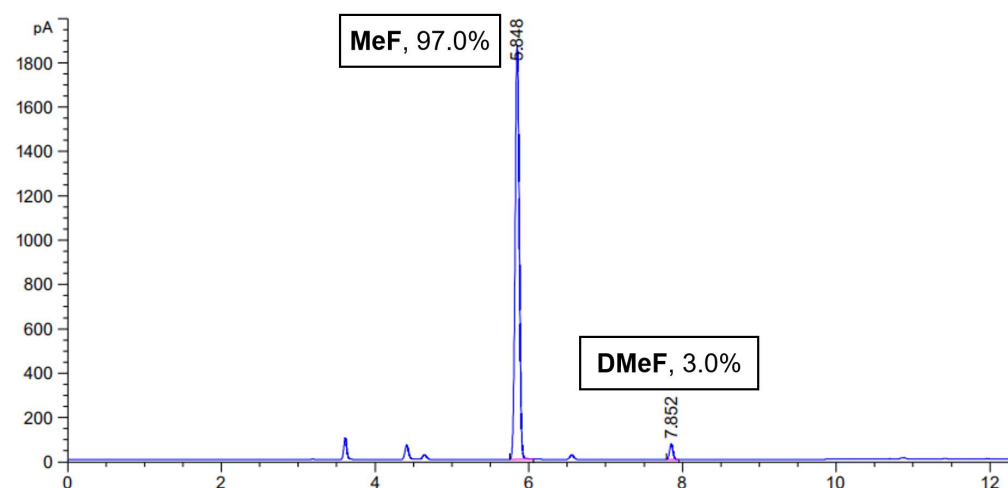

**Figure S72.** Relative uptake of the **MeF/DMeF** mixture ( $v:v = 90:10$ ) adsorbed in **EtP6 $\beta$**  after 24 hours using gas chromatography.

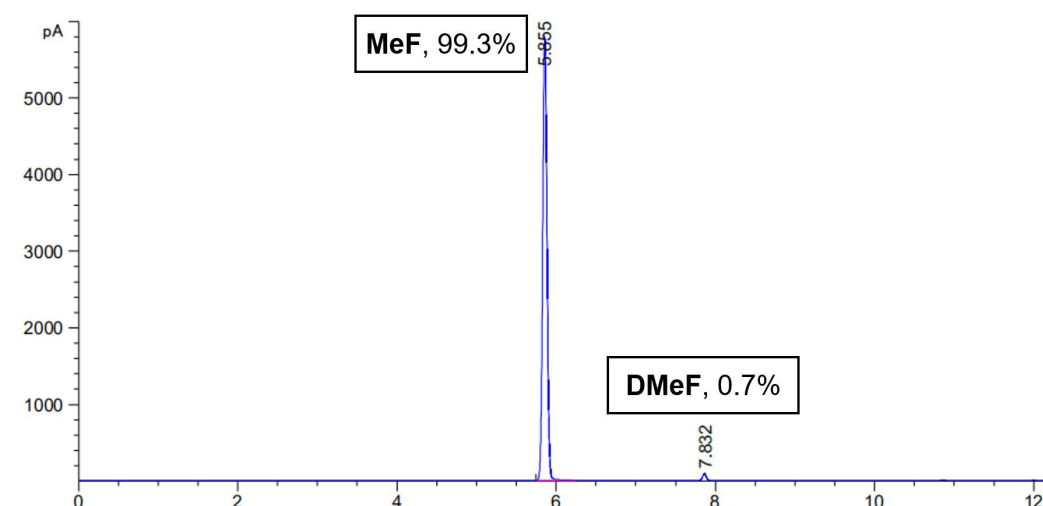

**Figure S73.** Relative uptake of the **MeF/DMeF** mixture ( $v:v = 90:10$ ) adsorbed in **BrP5 $\alpha$**  after 24 hours using gas chromatography.

## 7.2 Adsorption of three component equimolar **MeF**, **DMeF** and **MeTHF** mixture vapor

For each vapor-phase mixture experiment, an open 5.00 mL vial containing 20.00 mg of guest-free **EtP6 $\beta$**  or **BrP5 $\alpha$**  adsorbent was placed in a sealed 20.00 mL vial containing 1.00 mL of a 1:1:1  $v/v/v$  **MeF**, **DMeF** and **MeTHF** mixture. The relative uptake of **MeF**, **DMeF** or **MeTHF** by **EtP6 $\beta$**  or **BrP5 $\alpha$**  was measured by heating the crystals to release the adsorbed vapor using gas chromatography. Before measurements, the crystals were heated at 60 °C to remove the surface-physically adsorbed vapor.

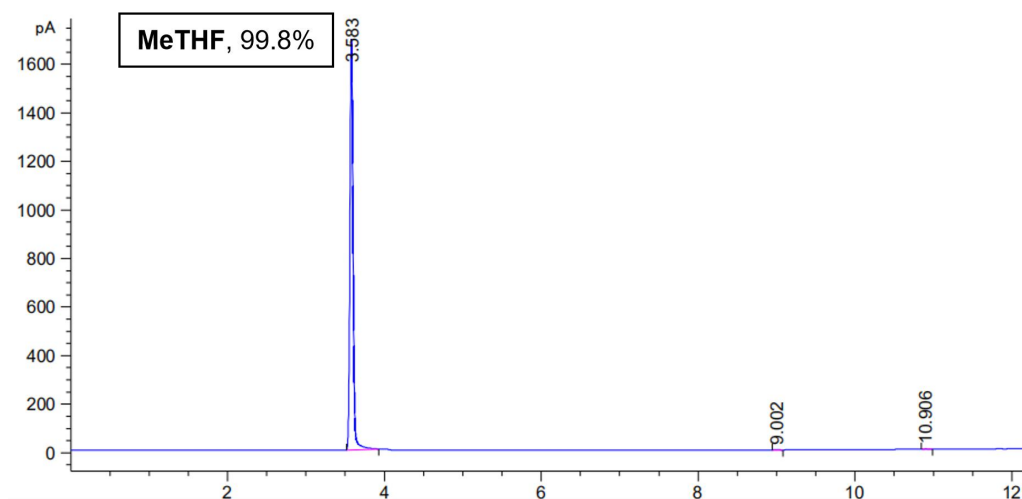

**Figure S74.** GC spectrum of **MeTHF**. This spectrum was obtained to show the position of the **MeTHF** peak.

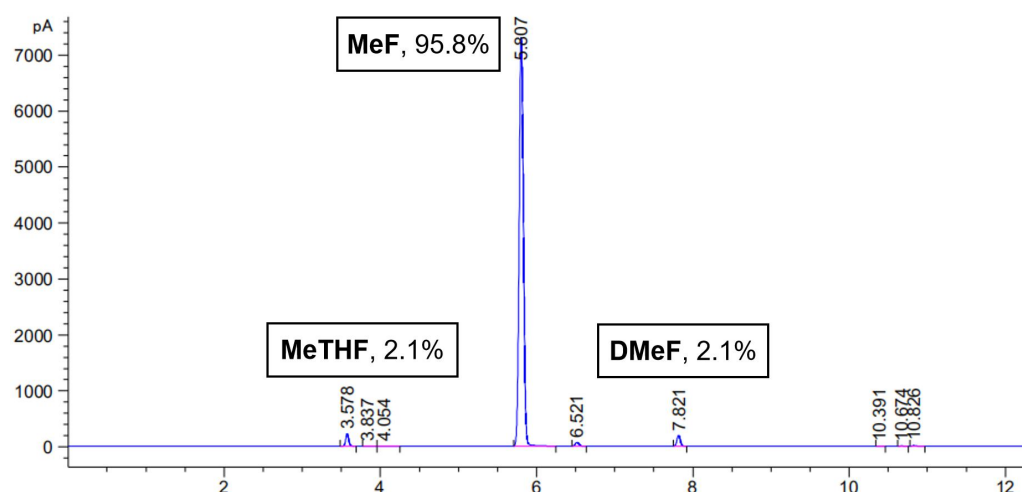

**Figure S75.** Relative uptake of the **MeF/DMeF/MeTHF** mixture ( $v:v:v = 1:1:1$ ) adsorbed in **EtP6 $\beta$**  after 24 hours using gas chromatography.

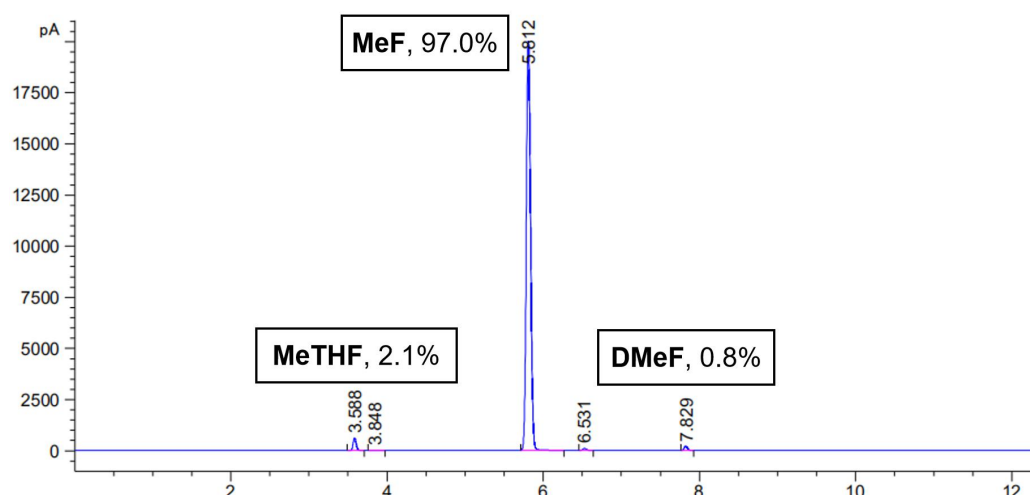

**Figure S76.** Relative uptake of the **MeF/DMeF/MeTHF** mixture (v:v:v = 1:1:1) adsorbed in **BrP5 $\alpha$**  after 24 hours using gas chromatography.

#### 8. References

- [S1] Hu, X.-B.; Chen, Z.; Chen, L.; Zhang, L.; Hou, J.-L.; Li, Z.-T.; Pillar[*n*]arenes (*n* = 8–10) with Two Cavities: Synthesis, Structures, and Complexing Properties. *Chem. Commun.* **2012**, 48, 10999–11001.
- [S2] Yao, Y.; Xue, M.; Chi, X.; Ma, Y.; He, J.; Ablizb, Z.; Huang, F. A New Water-Soluble Pillar[5]arene: Synthesis and Application in The Preparation of Gold Nanoparticles. *Chem. Commun.* **2012**, 48, 6505–6507;
- [S3] Yao, Y.; Li, J.; Dai, J.; Chi, X.; Xue, M. A Water-Soluble Pillar[6]arene: Synthesis, Host-Guest Chemistry, Controllable Self-Assembly, and Application in Controlled Release. *RSC Adv.* **2014**, 4, 9039–9043;
- [S4] Jie, K.; Liu, M.; Zhou, Y.; Little, M. A.; Pulido, A.; Chong, S. Y.; Stephenson, A.; Hughes, A. R.; Sakakibara, F.; Ogoshi, T.; Blanc, F.; Day, G. M.; Huang, F.; A. I. Cooper, Near-Ideal Xylene Selectivity in Adaptive Molecular Pillar[*n*]arene Crystals. *J. Am. Chem. Soc.* **2018**, 140, 6921–6930;
- [S5] Lide, D. R. CRC Handbook of Chemistry and Physics, Boca Raton, FL, **2005**, pp. 203–365.
